# Supplementary material for: A critical review on the toxicity regulation and ecological risks of zinc oxide nanoparticles to plants
Source: Royal Society of Chemistry journal article supplement (doi:10.1039/d3en00630a), 2023-11-07
Supplement: d3en00630a1.pdf [file d3en00630a1.pdf]

## Supplementary information

### A critical review on the toxicity regulation and ecological risks of zinc oxide nanoparticles to plants

Mengen Kang,<sup>‡a</sup> Yi Liu,<sup>‡a</sup> Yuzhu Weng,<sup>a</sup> Haoke Wang<sup>a</sup> and Xue Bai<sup>a,b,\*</sup>

*<sup>a</sup> Key Laboratory of Integrated Regulation and Resource Development on Shallow  
Lake of Ministry of Education, College of Environment, Hohai University, Nanjing  
210098, China*

*<sup>b</sup> Yangtze Institute for Conservation and Development, Hohai University, Nanjing  
210098, China*

\*Corresponding author: Xue Bai;

Address: Xikang Road No.1, Gulou District, Nanjing, China, 210098

(College of Environment, Hohai University, Nanjing);

Email: [baixue@hhu.edu.cn](mailto:baixue@hhu.edu.cn)

<sup>‡</sup> M. Kang and Y. Liu contributed equally to this work

**Table S1** Basic information about the retrieved scientific papers.

| No. | PT | Author                                                                                                                                                          | Title                                                                                                                                                                                           | Type                       | Conference Title                                                                                                   | ISO Source Abbreviation    | Year Published | DOI                               |
|-----|----|-----------------------------------------------------------------------------------------------------------------------------------------------------------------|-------------------------------------------------------------------------------------------------------------------------------------------------------------------------------------------------|----------------------------|--------------------------------------------------------------------------------------------------------------------|----------------------------|----------------|-----------------------------------|
| 1   | J  | Shen, Meimei; Liu, Weitao; Zeb, Aurang; Lian, Jiapan; Wu, Jiani; Lin, Maohong                                                                                   | Bioaccumulation and phytotoxicity of ZnO nanoparticles in soil-grown <i>Brassica chinensis</i> L. and potential risks                                                                           | Article                    |                                                                                                                    | J. Environ. Manage.        | 2022           | 10.1016/j.jenvman.2022.114454     |
| 2   | J  | Du, Jia; Tang, Junhong; Xu, Shaodan; Ge, Jingyuan; Dong, Yuwei; Li, Huanxuan; Jin, Meiqing                                                                      | ZnO nanoparticles: Recent advances in ecotoxicity and risk assessment                                                                                                                           | Review                     |                                                                                                                    | Drug Chem. Toxicol.        | 2020           | 10.1080/01480545.2018.1508218     |
| 3   | J  | Obrador, Ana; Gonzalez, Demetrio; Almendros, Patricia; Garcia-Gomez, Concepcion; Fernandez, Maria Dolores                                                       | Assessment of phytotoxicity and behavior of 1-year-aged Zn in soil from ZnO nanoparticles, bulk ZnO, and Zn sulfate in different soil-plant cropping systems: From biofortification to toxicity | Article                    |                                                                                                                    | J. Soil Sci. Plant Nutr.   | 2022           | 10.1007/s42729-021-00640-8        |
| 4   | J  | Wang, Fayuan; Jing, Xinxin; Adams, Catharine A.; Shi, Zhaoyong; Sun, Yuhuan                                                                                     | Decreased ZnO nanoparticle phytotoxicity to maize by arbuscular mycorrhizal fungus and organic phosphorus                                                                                       | Article                    |                                                                                                                    | Environ. Sci. Pollut. Res. | 2018           | 10.1007/s11356-018-2452-x         |
| 5   | J  | Singh, Divya; Kumar, Arun                                                                                                                                       | Quantification of metal uptake in <i>Spinacia oleracea</i> irrigated with water containing a mixture of CuO and ZnO nanoparticles                                                               | Article                    |                                                                                                                    | Chemosphere                | 2020           | 10.1016/j.chemosphere.2019.125239 |
| 6   | J  | Liu, Xueqin; Wang, Fayuan; Shi, Zhaoyong; Tong, Ruijian; Shi, Xiaojun                                                                                           | Bioavailability of Zn in ZnO nanoparticle-spiked soil and the implications to maize plants                                                                                                      | Article                    |                                                                                                                    | J. Nanopart. Res.          | 2015           | 10.1007/s11051-015-2989-2         |
| 7   | J  | Rajput, Vishnu; Minkina, Tatiana; Sushkova, Svetlana; Behal, Arvind; Maksimov, Alexey; Blicharska, Eliza; Ghazaryan, Karen; Movsesyan, Hasmik; Barsova, Natalia | ZnO and CuO nanoparticles: A threat to soil organisms, plants, and human health                                                                                                                 | Article; Proceedings Paper | European-Geosciences-Union (EGU) Conference on Soil Contamination and Human Health - Advances and Problems of Risk | Environ. Geochem. Health   | 2020           | 10.1007/s10653-019-00317-3        |

|    |   |                                                                                                                                                                              |                                                                                                                                                           |                   | Assessment                                     |                          |      |                                   |
|----|---|------------------------------------------------------------------------------------------------------------------------------------------------------------------------------|-----------------------------------------------------------------------------------------------------------------------------------------------------------|-------------------|------------------------------------------------|--------------------------|------|-----------------------------------|
| 8  | J | Karmous, Ines; Tlahig, Samir; Loumerem, Mohamed; Lachiheb, Belgacem; Bouhamda, Talel; Mabrouk, Mahmoud; Debouba, Mohamed; Chaoui, Abdelilah                                  | Assessment of the risks of copper- and zinc oxide-based nanoparticles used in <i>Vigna radiata</i> L. culture on food quality, human nutrition and health | Article           |                                                | Environ. Geochem. Health | 2022 | 10.1007/s10653-021-01162-z        |
| 9  | J | Ji, Hongting; Guo, Zhi; Wang, Guodong; Wang, Xin; Liu, Hongjiang                                                                                                             | Effect of ZnO and CuO nanoparticles on the growth, nutrient absorption, and potential health risk of the seasonal vegetable <i>Medicago polymorpha</i> L. | Article           |                                                | PeerJ                    | 2022 | 10.7717/peerj.14038               |
| 10 | J | Garcia-Gomez, Concepcion; Garcia, Sandra; Francisca Obrador, Ana; Gonzalez, Demetrio; Babin, Mar; Dolores Fernandez, Maria                                                   | Effects of aged ZnO NPs and soil type on Zn availability, accumulation and toxicity to pea and beet in a greenhouse experiment                            | Article           |                                                | Ecotox. Environ. Safe.   | 2018 | 10.1016/j.ecoenv.2018.05.019      |
| 11 | J | Doria-Manzur, Alonso; Sharifan, Hamidreza; Tejada-Benitez, Lesly                                                                                                             | Application of zinc oxide nanoparticles to promote remediation of nickel by <i>Sorghum bicolor</i> : Metal ecotoxic potency and plant response            | Article           |                                                | Int. J. Phytoremediat.   | 2023 | 10.1080/15226514.2022.2060934     |
| 12 | J | Li, Mengqi; Ahammedl, Golam J.; Li, Caixia; Bao, Xiao; Yu, Jingquan; Huang, Chunlei; Yin, Hanqin; Zhou, Jie                                                                  | Brassinosteroid ameliorates zinc oxide nanoparticles-induced oxidative stress by improving antioxidant potential and redox homeostasis in tomato seedling | Article           |                                                | Front. Plant Sci.        | 2016 | 10.3389/fpls.2016.00615           |
| 13 | J | Oscar, Bianca Vicente Costa; Melegari, Silvia Pedroso; Vicentini, Denice Schulz; Simioni, Carmen; Ouriques, Luciane Cristina; Puerari, Rodrigo Costa; Matias, William Gerson | Toxicological effects of pure and amine-functionalized ZnO nanorods on <i>Daphnia magna</i> and <i>Lactuca sativa</i>                                     | Article           |                                                | Environ. Sci.: Nano      | 2023 | 10.1039/d2en00622g                |
| 14 | J | Hou, Jing; Wu, Yazhou; Li, Xin; Wei, Benben; Li, Shiguo; Wang, Xiangke                                                                                                       | Toxic effects of different types of zinc oxide nanoparticles on algae, plants, invertebrates, vertebrates and microorganisms                              | Review            |                                                | Chemosphere              | 2018 | 10.1016/j.chemosphere.2017.11.077 |
| 15 | C | Samart, Sutichai; Chutipaijit, Sutee                                                                                                                                         | Growth of pigmented rice ( <i>Oryza sativa</i> L. cv. Riceberry) exposed to ZnO nanoparticles                                                             | Proceedings Paper | 1st International Conference of the Materials- | Mater. Today-Proc.       | 2019 | 10.1016/j.matpr.2019.06.246       |

|    |   |                                                                                                                                               |                                                                                                                                                                                              |                       |                                             |                              |      |                                   |
|----|---|-----------------------------------------------------------------------------------------------------------------------------------------------|----------------------------------------------------------------------------------------------------------------------------------------------------------------------------------------------|-----------------------|---------------------------------------------|------------------------------|------|-----------------------------------|
|    |   |                                                                                                                                               |                                                                                                                                                                                              |                       | Research-Society-of-Thailand (MRS-Thailand) |                              |      |                                   |
| 16 | J | Song, Uham; Kim, Jieun                                                                                                                        | Zinc oxide nanoparticles: A potential micronutrient fertilizer for horticultural crops with little toxicity                                                                                  | Article               |                                             | Hortic. Environ. Biotechnol. | 2020 | 10.1007/s13580-020-00244-8        |
| 17 | J | Basahi, M. A.                                                                                                                                 | Effects of zinc oxide nanoparticles on germination and seedling establishment of pea ( <i>Pisum sativum</i> ) and beans ( <i>Phaseolus vulgaris</i> )                                        | Article; Early Access |                                             | Appl. Ecol. Environ. Res.    | 2022 | 10.15666/aeer/2005_38933909       |
| 18 | J | Fellmann, Sebastian; Eichert, Thomas                                                                                                          | Acute effects of engineered nanoparticles on the growth and gas exchange of <i>Zea mays</i> L.-what are the underlying causes?                                                               | Article               |                                             | Water Air Soil Pollut.       | 2017 | 10.1007/s11270-017-3364-y         |
| 19 | J | Sheteiwy, Mohamed Salah; Shaghaleh, Hiba; Hamoud, Yousef Alhaj; Holford, Paul; Shao, Hongbo; Qi, Weicong; Hashmi, Muhammad Zaffar; Wu, Tianow | Zinc oxide nanoparticles: Potential effects on soil properties, crop production, food processing, and food quality                                                                           | Review                |                                             | Environ. Sci. Pollut. Res.   | 2021 | 10.1007/s11356-021-14542-w        |
| 20 | J | Iziy, Elham; Majd, Ahmad; Vaezi-Kakhki, Mohammad Reza; Nejadstattari, Taher; Noureini, Sakineh Kazemi                                         | Effects of zinc oxide nanoparticles on enzymatic and nonenzymatic antioxidant content, germination, and biochemical and ultrastructural cell characteristics of <i>Portulaca oleracea</i> L. | Article               |                                             | Acta Soc. Bot. Pol.          | 2019 | 10.5586/asbp.3639                 |
| 21 | J | Wang, Fayuan; Liu, Xueqin; Shi, Zhaoyong; Tong, Ruijian; Adams, Catharine A.; Shi, Xiaojun                                                    | Arbuscular mycorrhizae alleviate negative effects of zinc oxide nanoparticle and zinc accumulation in maize plants - A soil microcosm experiment                                             | Article               |                                             | Chemosphere                  | 2016 | 10.1016/j.chemosphere.2015.12.076 |
| 22 | J | Garcia-Gomez, C.; Babin, M.; Obrador, A.; Alvarez, J. M.; Fernandez, M. D.                                                                    | Integrating ecotoxicity and chemical approaches to compare the effects of ZnO nanoparticles, ZnO bulk, and ZnCl <sub>2</sub> on plants and microorganisms in a natural soil                  | Article               |                                             | Environ. Sci. Pollut. Res.   | 2015 | 10.1007/s11356-015-4867-y         |
| 23 | J | Wang, Fayuan; Adams, Catharine A.; Shi, Zhaoyong; Sun, Yuhuan                                                                                 | Combined effects of ZnO NPs and Cd on sweet sorghum as influenced by an arbuscular mycorrhizal fungus                                                                                        | Article               |                                             | Chemosphere                  | 2018 | 10.1016/j.chemosphere.2018.06.099 |
| 24 | J | Singh, Ajey; Singh, N. B.; Afzal, Shadma; Singh, Tanu;                                                                                        | Zinc oxide nanoparticles: A review of their biological synthesis, antimicrobial                                                                                                              | Review                |                                             | J. Mater. Sci.               | 2018 | 10.1007/s10853-017-1544-1         |

|    |   |                                                                                                                                                                                                    |                                                                                                                                                                          |         |  |                                |      |                                 |
|----|---|----------------------------------------------------------------------------------------------------------------------------------------------------------------------------------------------------|--------------------------------------------------------------------------------------------------------------------------------------------------------------------------|---------|--|--------------------------------|------|---------------------------------|
|    |   | Hussain, Imtiyaz                                                                                                                                                                                   | activity, uptake, translocation and biotransformation in plants                                                                                                          |         |  |                                |      |                                 |
| 25 | J | Dogaroglu, Zeynep Gorkem; Ece, Fatma; Ciftci, Buva Nur; Yildirimcan, Saadet; Erat, Selma                                                                                                           | Evaluation of stress factor on wheat ( <i>Triticum aestivum</i> ): The effect of ZnO and Ni-doped ZnO nanoparticles                                                      | Article |  | Toxicol Environ. Chem.         | 2021 | 10.1080/02772248.2021.1923714   |
| 26 | J | Pullagurala, Venkata L. Reddy; Adisa, Ishaq O.; Rawat, Swati; Kim, Bojeong; Barrios, Ana C.; Medina-Velo, Ilyya A.; Hernandez-Viezcas, Jose A.; Peralta-Videa, Jose R.; Gardea-Torresdey, Jorge L. | Finding the conditions for the beneficial use of ZnO nanoparticles towards plants-A review                                                                               | Review  |  | Environ. Pollut.               | 2018 | 10.1016/j.envpol.2018.06.036    |
| 27 | J | Tao, Han; Hu, Songshen; Xia, Chuchu; Wang, Mengyu; Wang, Tonglin; Zeng, Wei; Li, Yubo; Chen, Hao; Zheng, Jirong; Wang, Qiaomei                                                                     | Involvement of glucosinolates in the resistance to zinc oxide nanoparticle-induced toxicity and growth inhibition in <i>Arabidopsis</i>                                  | Article |  | Environ. Sci.: Process Impacts | 2021 | 10.1039/d1em00134e              |
| 28 | J | Bandyopadhyay, Susmita; Plascencia-Villa, German; Mukherjee, Arnab; Rico, Cyren M.; Jose-Yacamán, Miguel; Peralta-Videa, Jose R.; Gardea-Torresdey, Jorge L.                                       | Comparative phytotoxicity of ZnO NPs, bulk ZnO, and ionic zinc onto the alfalfa plants symbiotically associated with <i>Sinorhizobium meliloti</i> in soil               | Article |  | Sci. Total Environ.            | 2015 | 10.1016/j.scitotenv.2015.02.014 |
| 29 | J | Ahmed, Bilal; Rizvi, Asfa; Zaidi, Almas; Khan, Mohammad Saghir; Musarrat, Javed                                                                                                                    | Understanding the phyto-interaction of heavy metal oxide bulk and nanoparticles: Evaluation of seed germination, growth, bioaccumulation, and metallothionein production | Article |  | RSC Adv.                       | 2019 | 10.1039/c8ra09305a              |
| 30 | J | Dong, Mengyuan; Sun, Rong; Yang, Qianhui; Zhang, Lantian; Yong, Yangying; Fang, Yunxia; Zhang, Xian; Zhang, Xiaoqin; Xue, Dawei                                                                    | Phenotype, physiology, and gene expression of barley seedlings in response to nano zinc oxide stress                                                                     | Article |  | Phyton-Int. J. Exp. Bot.       | 2021 | 10.32604/phyton.2021.017465     |
| 31 | J | Song, Uhram; Lee, Sunryung                                                                                                                                                                         | Phytotoxicity and accumulation of zinc oxide nanoparticles on the aquatic plants <i>Hydrilla verticillata</i> and <i>Phragmites Australis</i> : Leaf-type-               | Article |  | Environ. Sci. Pollut. Res.     | 2016 | 10.1007/s11356-015-5982-5       |

|    |   |                                                                                                                                                                                                                                                                             |                                                                                                                                                                                                                                                    |         |  |                            |      |                                    |
|----|---|-----------------------------------------------------------------------------------------------------------------------------------------------------------------------------------------------------------------------------------------------------------------------------|----------------------------------------------------------------------------------------------------------------------------------------------------------------------------------------------------------------------------------------------------|---------|--|----------------------------|------|------------------------------------|
|    |   |                                                                                                                                                                                                                                                                             | dependent responses                                                                                                                                                                                                                                |         |  |                            |      |                                    |
| 32 | J | Mukherjee, Arnab; Peralta-Videa, Jose R.; Bandyopadhyay, Susmita; Rico, Cyren M.; Zhao, Lijuan; Gardea-Torresdey, Jorge L.                                                                                                                                                  | Physiological effects of nanoparticulate ZnO in green peas ( <i>Pisum sativum</i> L.) cultivated in soil                                                                                                                                           | Article |  | Metallomics                | 2014 | 10.1039/c3mt00064h                 |
| 33 | J | Sabir, Sumera; Zahoor, Muhammad Asif; Waseem, Muhammad; Siddique, Muhammad Hussain; Shafique, Muhammad; Imran, Muhammad; Hayat, Sumreen; Malik, Imran Riaz; Muzammil, Saima                                                                                                 | Biosynthesis of ZnO nanoparticles using <i>Bacillus subtilis</i> : Characterization and nutritive significance for promoting plant growth in <i>Zea mays</i> L                                                                                     | Article |  | Dose-Response              | 2020 | 10.1177/1559325820958911           |
| 34 | J | Dogaroglu, Zeynep Gorkem; Uysal, Yagmur; caylali, Zehranur; Karakulak, Delil Sefkan                                                                                                                                                                                         | Green nanotechnology advances: Green manufacturing of zinc nanoparticles, characterization, and foliar application on wheat and antibacterial characteristics using <i>Mentha spicata</i> (mint) and <i>Ocimum basilicum</i> (basil) leaf extracts | Article |  | Environ. Sci. Pollut. Res. | 2023 | 10.1007/s11356-023-26827-3         |
| 35 | J | Pagano, Luca; Pasquali, Francesco; Majumdar, Sanghamitra; De la Torre-Roche, Roberto; Zuverza-Mena, Nubia; Villani, Marco; Zappettini, Andrea; Marra, Robert E.; Isch, Susan M.; Marmiroli, Marta; Maestri, Elena; Dhankher, Om Parkash; White, Jason C.; Marmiroli, Nelson | Exposure of <i>Cucurbita pepo</i> to binary combinations of engineered nanomaterials: Physiological and molecular response                                                                                                                         | Article |  | Environ. Sci.: Nano        | 2017 | 10.1039/c7en00219j                 |
| 36 | J | Zhu, Yi; Wu, Jianhua; Chen, Ming; Liu, Xianli; Xiong, Yijie; Wang, Yanyan; Feng, Tao; Kang, Shuang; Wang, Xianfeng                                                                                                                                                          | Recent advances in the biotoxicity of metal oxide nanoparticles: Impacts on plants, animals and microorganisms                                                                                                                                     | Review  |  | Chemosphere                | 2019 | 10.1016/j.chemosphere.2019.12.4403 |
| 37 | J | Xu, Jiangbing; Luo, Xiaosan; Wang, Yanling; Feng, Youzhi                                                                                                                                                                                                                    | Evaluation of zinc oxide nanoparticles on lettuce ( <i>Lactuca sativa</i> L.) growth and soil bacterial community                                                                                                                                  | Article |  | Environ. Sci. Pollut. Res. | 2018 | 10.1007/s11356-017-0953-7          |

|    |   |                                                                                                                                                                                    |                                                                                                                                                             |         |  |                            |      |                                   |
|----|---|------------------------------------------------------------------------------------------------------------------------------------------------------------------------------------|-------------------------------------------------------------------------------------------------------------------------------------------------------------|---------|--|----------------------------|------|-----------------------------------|
| 38 | J | Iftikhar, Azka; Ali, Shafaqat; Yasmeen, Tahira; Arif, Muhammad Saleem; Zubair, Muhammad; Rizwan, Muhammad; Alhaithloul, Haifa Abdulaziz S.; Alayafi, Aisha A. M.; Soliman, Mona H. | Effect of gibberellic acid on growth, photosynthesis and antioxidant defense system of wheat under zinc oxide nanoparticle stress                           | Article |  | Environ. Pollut.           | 2019 | 10.1016/j.envpol.2019.113109      |
| 39 | J | Bhat, U. H.; Sami, F.; Siddiqui, H.; Faizan, M.; Faraz, A.; Hayat, S.                                                                                                              | Nitric oxide alleviates zinc oxide nanoparticles-induced phytotoxicity in <i>Brassica juncea</i>                                                            | Article |  | Russ. J. Plant Physiol.    | 2021 | 10.1134/S102144372103002X         |
| 40 | J | Mazaheri-Tirani, M.; Dayani, S.                                                                                                                                                    | Growth, flowering and physiological response of <i>Trachyspermum ammi</i> L. to zinc oxide micro- and nanoparticles                                         | Article |  | Russ. J. Plant Physiol.    | 2022 | 10.1134/S1021443722010125         |
| 41 | J | Basit, Farwa; Nazir, Muhammad Mudassir; Shahid, Muhammad; Abbas, Saghir; Javed, Muhammad Tariq; Naqqash, Tahir; Liu, Yihan; Guan Yajing                                            | Application of zinc oxide nanoparticles immobilizes the chromium uptake in rice plants by regulating the physiological, biochemical and cellular attributes | Article |  | Physiol. Mol. Biol. Plants | 2022 | 10.1007/s12298-022-01207-2        |
| 42 | J | Zhang, Dongqing; Hua, Tao; Xiao, Fei; Chen, Chunping; Gersberg, Richard M.; Liu, Yu; Stuckey, David; Ng, Wun Jern; Tan, Soon Keat                                                  | Phytotoxicity and bioaccumulation of ZnO nanoparticles in <i>Schoenoplectus tabernaemontani</i>                                                             | Article |  | Chemosphere                | 2015 | 10.1016/j.chemosphere.2014.06.041 |
| 43 | J | Kashyap, Deeksha; Siddiqui, Zaki Anwar                                                                                                                                             | Effect of zinc oxide nanoparticles and rhizobium leguminosarum on growth, photosynthetic pigments and blight disease complex of pea                         | Article |  | Gesunde Pflanz.            | 2022 | 10.1007/s10343-021-00586-y        |
| 44 | J | Mukherjee, Arnab; Pokhrel, Suman; Bandyopadhyay, Susmita; Maedler, Lutz; Peralta-Videa, Jose R.; Gardea-Torresdey, Jorge L.                                                        | A soil mediated phyto-toxicological study of iron doped zinc oxide nanoparticles (Fe@ZnO) in green peas ( <i>Pisum sativum</i> L.)                          | Article |  | Chem. Eng. J.              | 2014 | 10.1016/j.cej.2014.06.112         |
| 45 | J | Hu, Changwei; Liu, Xu; Li, Xiuling; Zhao, Yongjun                                                                                                                                  | Evaluation of growth and biochemical indicators of <i>Salvinia natans</i> exposed to zinc oxide nanoparticles and zinc accumulation in plants               | Article |  | Environ. Sci. Pollut. Res. | 2014 | 10.1007/s11356-013-1970-9         |
| 46 | J | Rehman, Riaz Ur; Khan, Bakhtawar; Aziz, Tehmina; Gul, Faiza Zareen; Nasreen, Syeda; Zia, Muhammad                                                                                  | Postponement growth and antioxidative response of <i>Brassica nigra</i> on CuO and ZnO nanoparticles exposure under soil conditions                         | Article |  | IET Nanobiotechnol.        | 2020 | 10.1049/iet-nbt.2019.0357         |

|    |   |                                                                                                                                                                        |                                                                                                                                 |                       |  |                                         |      |                               |
|----|---|------------------------------------------------------------------------------------------------------------------------------------------------------------------------|---------------------------------------------------------------------------------------------------------------------------------|-----------------------|--|-----------------------------------------|------|-------------------------------|
| 47 | J | Sun, Liangliang; Wang, Yibo; Wang, Ruling; Wang, Ruting; Zhang, Ping; Ju, Qiong; Xu, Jin                                                                               | Physiological, transcriptomic, and metabolomic analyses reveal zinc oxide nanoparticles modulate plant growth in tomato         | Article               |  | Environ. Sci.: Nano                     | 2020 | 10.1039/d0en00723d            |
| 48 | J | Miliauskiene, Jurga; Brazaityte, Ausra; Sutuliene, Ruta; Urbutis, Martynas; Tuckute, Simona                                                                            | ZnO nanoparticle size-dependent effects on Swiss chard growth and nutritional quality                                           | Article               |  | Agriculture-Basel                       | 2022 | 10.3390/agriculture12111905   |
| 49 | J | Mahmud, S.; Din, Z.                                                                                                                                                    | Using a pilot plant to synthesise ZnO powder: Particle characterisation and marine toxicity studies                             | Article               |  | Sains Malays.                           | 2014 |                               |
| 50 | J | Caldelas, C.; Poitrasson, F.; Viers, J.; Araus, J. L.                                                                                                                  | Stable Zn isotopes reveal the uptake and toxicity of zinc oxide engineered nanomaterials in <i>Phragmites australis</i>         | Article               |  | Environ. Sci.: Nano                     | 2020 | 10.1039/d0en00110d            |
| 51 | J | Ebbs, Stephen D.; Bradfield, Scott J.; Kumar, Pawan; White, Jason C.; Musante, Craig; Ma, Xingmao                                                                      | Accumulation of zinc, copper, or cerium in carrot ( <i>Daucus carota</i> ) exposed to metal oxide nanoparticles and metal ions  | Article               |  | Environ. Sci.: Nano                     | 2016 | 10.1039/c5en00161g            |
| 52 | J | Keshta, Fadya S. S.; Shetaya, Waleed H. H.; Marzouk, Ezzat R. R.                                                                                                       | The toxicity and uptake of bulk and nano-sized ZnO particles in wheat ( <i>Triticum aestivum</i> ) seedlings                    | Article; Early Access |  | J. Plant Nutr.                          | 2023 | 10.1080/01904167.2023.2210599 |
| 53 | J | Xiao, Lian; Wang, Shouxia; Yang, Daoyong; Zou, Zhengkang; Li, Junli                                                                                                    | Physiological effects of MgO and ZnO nanoparticles on the <i>Citrus maxima</i>                                                  | Article               |  | J. Wuhan Univ. Technol.-Mat. Sci. Edit. | 2019 | 10.1007/s11595-019-2042-x     |
| 54 | J | Wang, X. P.; Li, Q. Q.; Pei, Z. M.; Wang, S. C.                                                                                                                        | Effects of zinc oxide nanoparticles on the growth, photosynthetic traits, and antioxidative enzymes in tomato plants            | Article               |  | Biol. Plant.                            | 2018 | 10.1007/s10535-018-0813-4     |
| 55 | J | Khan, Ali Raza; Wakeel, Abdul; Muhammad, Noor; Liu, Bohan; Wu, Minjie; Liu, Yihua; Ali, Imran; Zaidi, Syed Hassan Raza; Azhar, Wardah; Song, Ge; Wu, Junyu; Gan, Yinbo | Involvement of ethylene signaling in zinc oxide nanoparticle-mediated biochemical changes in <i>Arabidopsis thaliana</i> leaves | Article               |  | Environ. Sci.: Nano                     | 2019 | 10.1039/c8en00971f            |
| 56 | J | Liu, Lingrui; Nian, Hai; Lian, Tengxiang                                                                                                                               | Plants and rhizospheric environment: Affected by zinc oxide nanoparticles (ZnO NPs). A review                                   | Article               |  | Plant Physiol. Biochem.                 | 2022 | 10.1016/j.plaphy.2022.05.032  |
| 57 | J | Dogaroglu, Zeynep Gorkem; Eren, Abdullah; Baran, M. Firat                                                                                                              | Effects of ZnO nanoparticles and ethylenediamine-N,N'-disuccinic acid on seed germination of four different plants              | Article               |  | Glob. Chall.                            | 2019 | 10.1002/gch2.201800111        |



|    |   |                                                                                                                                                                                                                              |                                                                                                                                                                                                                                           |                   |                                                                                   |                               |      |                                   |
|----|---|------------------------------------------------------------------------------------------------------------------------------------------------------------------------------------------------------------------------------|-------------------------------------------------------------------------------------------------------------------------------------------------------------------------------------------------------------------------------------------|-------------------|-----------------------------------------------------------------------------------|-------------------------------|------|-----------------------------------|
| 58 | J | Alenezi, Norah Arrak; Al-Qurainy, Fahad; Tarrour, Mohamed; Nadeem, Mohammad; Khan, Salim; Salih, Abdalrhaman M.; Shaikhaldein, Hassan O.; Alfarraj, Norah S.; Gaafar, Abdel-Rhman Z.; Al-Hashimi, Abdulrahman; Alansi, Saleh | Zinc oxide nanoparticles (ZnO NPs), biosynthesis, characterization and evaluation of their impact to improve shoot growth and to reduce salt toxicity on <i>Salvia officinalis</i> in vitro cultivated                                    | Article           |                                                                                   | Processes                     | 2022 | 10.3390/pr10071273                |
| 59 | J | Wang, Xiaoping; Yang, Xiyu; Chen, Siyu; Li, Qianqian; Wang, Wei; Hou, Chunjiang; Gao, Xiao; Wang, Li; Wang, Shucai                                                                                                           | Zinc oxide nanoparticles affect biomass accumulation and photosynthesis in <i>Arabidopsis</i>                                                                                                                                             | Article           |                                                                                   | Front. Plant Sci.             | 2016 | 10.3389/fpls.2015.01243           |
| 60 | J | Adhikari, Sinchan; Adhikari, Ayan; Ghosh, Supriya; Roy, Doyel; Azahar, Ikbali; Basuli, Debapriya; Hossain, Zahed                                                                                                             | Assessment of ZnO-NPs toxicity in maize: An integrative microRNAomic approach                                                                                                                                                             | Article           |                                                                                   | Chemosphere                   | 2020 | 10.1016/j.chemosphere.2020.126197 |
| 61 | C | Samart, Sutichai; Chutipaijit, Sutee; Phakamas, Nittaya                                                                                                                                                                      | Evaluating the effect of zinc oxide nanoparticles on the physiological responses of nine non-photoperiod sensitive rice cultivars                                                                                                         | Proceedings Paper | International Conference on Science and Technology of Emerging Materials (STEAMa) | Mater. Today-Proc.            | 2017 | 10.1016/j.matpr.2017.06.149       |
| 62 | J | Ahmad, Parvaiz; Alyemeni, Mohammed Nasser; Al-Huqail, Asma A.; Alqahtani, Monerah A.; Wijaya, Leonard; Ashraf, Muhammad; Kaya, Cengiz; Bajguz, Andrzej                                                                       | Zinc oxide nanoparticles application alleviates arsenic (As) toxicity in soybean plants by restricting the uptake of As and modulating key biochemical attributes, antioxidant enzymes, ascorbate-glutathione cycle and glyoxalase system | Article           |                                                                                   | Plants-Basel                  | 2020 | 10.3390/plants9070825             |
| 63 | J | Mazaheri-Tirani, Maryam; Dayani, Soleyman                                                                                                                                                                                    | In vitro effect of zinc oxide nanoparticles on <i>Nicotiana tabacum</i> callus compared to ZnO micro particles and zinc sulfate (ZnSO <sub>4</sub> )                                                                                      | Article           |                                                                                   | Plant Cell Tissue Organ Cult. | 2020 | 10.1007/s11240-019-01725-0        |
| 64 | J | Ni, Yifan; Xiao, Lian; Wan, Fengting; Xu, Mengxuan; Qiu, Lingzhi; Li, Junfeng; Li, Junli                                                                                                                                     | Comparison of the effects of ZnO NPs, MgO NPs and ionic zinc and magnesium on wheat plants                                                                                                                                                | Article           |                                                                                   | Fresenius Environ. Bull.      | 2019 |                                   |

|    |   |                                                                                                                                                                                                     |                                                                                                                                                                                                 |         |  |                                     |      |                               |
|----|---|-----------------------------------------------------------------------------------------------------------------------------------------------------------------------------------------------------|-------------------------------------------------------------------------------------------------------------------------------------------------------------------------------------------------|---------|--|-------------------------------------|------|-------------------------------|
| 65 | J | Tabande, Leila; Sepehri, Mozghan; Yasrebi, Jafar; Zarei, Mehdi; Ghasemi-Fasaei, Reza; Khatabi, Behnam                                                                                               | A comparison between the function of <i>Serendipita indica</i> and <i>Sinorhizobium meliloti</i> in modulating the toxicity of zinc oxide nanoparticles in alfalfa ( <i>Medicago sativa</i> L.) | Article |  | Environ. Sci. Pollut. Res.          | 2022 | 10.1007/s11356-021-16287-y    |
| 66 | J | Rossi, Lorenzo; Fedenia, Lauren N.; Sharifan, Hamidreza; Ma, Xingmao; Lombardini, Leonardo                                                                                                          | Effects of foliar application of zinc sulfate and zinc nanoparticles in coffee ( <i>Coffea arabica</i> L.) plants                                                                               | Article |  | Plant Physiol. Biochem.             | 2019 | 10.1016/j.plaphy.2018.12.005  |
| 67 | J | Yang, Zhongzhou; Chen, Jing; Dou, Runzhi; Gao, Xiang; Mao, Chuanbin; Wang, Li                                                                                                                       | Assessment of the phytotoxicity of metal oxide nanoparticles on two crop plants, maize ( <i>Zea mays</i> L.) and rice ( <i>Oryza sativa</i> L.)                                                 | Article |  | Int. J. Environ. Res. Public Health | 2015 | 10.3390/ijerph121214963       |
| 68 | J | Mukherjee, Arnab; Sun, Youping; Morelius, Erving; Tamez, Carlos; Bandyopadhyay, Susmita; Niu, Genhua; White, Jason C.; Peralta-Videa, Jose R.; Gardea-Torresdey, Jorge L.                           | Differential toxicity of bare and hybrid ZnO nanoparticles in green pea ( <i>Pisum sativum</i> L.): A life cycle study                                                                          | Article |  | Front. Plant Sci.                   | 2016 | 10.3389/fpls.2015.01242       |
| 69 | J | Taherbahrani, Saadiyeh; Zoufan, Parzhak; Zargar, Behrooz                                                                                                                                            | Modulation of the toxic effects of zinc oxide nanoparticles by exogenous salicylic acid pretreatment in <i>Chenopodium murale</i> L.                                                            | Article |  | Environ. Sci. Pollut. Res.          | 2021 | 10.1007/s11356-021-15566-y    |
| 70 | J | Rajput, Vishnu D.; Minkina, Tatiana; Fedorenko, Aleksei; Chernikova, Natalia; Hassan, Tara; Mandzhieva, Saglara; Sushkova, Svetlana; Lysenko, Vladimir; Soldatov, Mikhail A.; Burachevskaya, Marina | Effects of zinc oxide nanoparticles on physiological and anatomical indices in spring barley tissues                                                                                            | Article |  | Nanomaterials                       | 2021 | 10.3390/nano11071722          |
| 71 | J | Rasouli, Farzad; Asadi, Mohammad; Hassanpouraghdam, Mohammad Bagher; Aazami, Mohammad Ali; Ebrahimzadeh, Asghar; Kakaei, Karim; Dokoupil, Libor; Mlcek, Jiri                                        | Foliar application of ZnO-NPs influences chlorophyll fluorescence and antioxidants pool in <i>Capsicum annum</i> L. under salinity                                                              | Article |  | Horticulturae                       | 2022 | 10.3390/horticulturae8100908  |
| 72 | J | Chen, Hao                                                                                                                                                                                           | Metal based nanoparticles in agricultural system: Behavior, transport,                                                                                                                          | Review  |  | Chem. Speciation Bioavail.          | 2018 | 10.1080/09542299.2018.1520050 |

|    |   |                                                                                                                                              |                                                                                                                                                                         |         |  |                         |      |                               |
|----|---|----------------------------------------------------------------------------------------------------------------------------------------------|-------------------------------------------------------------------------------------------------------------------------------------------------------------------------|---------|--|-------------------------|------|-------------------------------|
|    |   |                                                                                                                                              | and interaction with plants                                                                                                                                             |         |  |                         |      |                               |
| 73 | J | Faizan, Mohammad; Bhat, Javaid Akhter; Chen, Chen; Alyemini, Mohammed Nasser; Wijaya, Leonard; Ahmad, Parvaiz; Yu, Fangyuan                  | Zinc oxide nanoparticles (ZnO-NPs) induce salt tolerance by improving the antioxidant system and photosynthetic machinery in tomato                                     | Article |  | Plant Physiol. Biochem. | 2021 | 10.1016/j.plaphy.2021.02.002  |
| 74 | J | Javed, Rabia; Yucesan, Buhara; Zia, Muhammad; Gurel, Ekrem                                                                                   | Elicitation of secondary metabolites in callus cultures of <i>Stevia rebaudiana</i> bertonii grown under ZnO and CuO nanoparticles stress                               | Article |  | Sugar Tech.             | 2018 | 10.1007/s12355-017-0539-1     |
| 75 | J | Du, Wenchao; Tan, Wenjuan; Peralta-Videa, Jose R.; Gardea-Torresdey, Jorge L.; Ji, Rong; Yin, Ying; Guo, Hongyan                             | Interaction of metal oxide nanoparticles with higher terrestrial plants: Physiological and biochemical aspects                                                          | Review  |  | Plant Physiol. Biochem. | 2017 | 10.1016/j.plaphy.2016.04.024  |
| 76 | J | Balazova, L'udmila; Babula, Petr; Balaz, Matej; Backorova, Miriam; Bujnakova, Zdenka; Briancin, Jaroslav; Kurmanbayeva, Assylay; Sagi, Moshe | Zinc oxide nanoparticles phytotoxicity on halophyte from genus <i>Salicornia</i>                                                                                        | Article |  | Plant Physiol. Biochem. | 2018 | 10.1016/j.plaphy.2018.06.013  |
| 77 | J | Alhammad, Bushra Ahmed; Ahmad, Awais; Seleiman, Mahmoud F. F.                                                                                | Nano-hydroxyapatite and ZnO-NPs mitigate Pb stress in maize                                                                                                             | Article |  | Agronomy-Basel          | 2023 | 10.3390/agronomy13041174      |
| 78 | J | Sarkhosh, Sara; Kahrizi, Danial; Darvishi, Elahe; Tourang, Masoud; Haghghi-Mood, Sohrab; Vahedi, Parviz; Ercisli, Sezai                      | Effect of zinc oxide nanoparticles (ZnO-NPs) on seed germination characteristics in two brassicaceae family species: <i>Camelina sativa</i> and <i>Brassica napus</i> L | Article |  | J. Nanomater.           | 2022 | 10.1155/2022/1892759          |
| 79 | J | Raghib, Fariha; Naikoo, Mohd Irfan; Khan, Fareed Ahmad; Alyemini, Mohammed Nasser; Ahmad, Parvaiz                                            | Interaction of ZnO nanoparticle and AM fungi mitigates Pb toxicity in wheat by upregulating antioxidants and restricted uptake of Pb                                    | Article |  | J. Biotechnol.          | 2020 | 10.1016/j.jbiotec.2020.09.003 |
| 80 | J | Sofy, Ahmed R.; Sofy, Mahmoud R.; Hmed, Ahmed A.; Dawoud, Rehab A.; Alnaggar, Abd El-Aleem                                                   | Ameliorating the adverse effects of tomato mosaic tobamovirus infecting tomato plants in egypt by boosting immunity in tomato plants using zinc                         | Article |  | Molecules               | 2021 | 10.3390/molecules26051337     |

|    |   |                                                                                                                                                                                              |                                                                                                                                                                                                  |         |  |                            |      |                                   |
|----|---|----------------------------------------------------------------------------------------------------------------------------------------------------------------------------------------------|--------------------------------------------------------------------------------------------------------------------------------------------------------------------------------------------------|---------|--|----------------------------|------|-----------------------------------|
|    |   | M.; Soliman, Ahmed M.; El-DougDoug, Noha K.                                                                                                                                                  | oxide nanoparticles                                                                                                                                                                              |         |  |                            |      |                                   |
| 81 | J | Skiba, Elzbieta; Pietrzak, Monika; Glinska, Slawa; Wolf, Wojciech M.                                                                                                                         | The combined effect of ZnO and CeO <sub>2</sub> nanoparticles on <i>Pisum sativum</i> L.: A photosynthesis and nutrients uptake study                                                            | Article |  | Cells                      | 2021 | 10.3390/cells10113105             |
| 82 | J | Ramzan, Musarrat; Ayub, Fazila; Shah, Anis Ali; Naz, Gul; Shah, Adnan Noor; Malik, Aqsa; Sardar, Rehana; Telesinski, Arkadiusz; Kalaji, Hazem M.; Dessoky, Eldessoky S.; Elgawad, Hamada Abd | Synergistic effect of zinc oxide nanoparticles and moringa oleifera leaf extract alleviates cadmium toxicity in <i>Linum usitatissimum</i> : Antioxidants and physiochemical studies             | Article |  | Front. Plant Sci.          | 2022 | 10.3389/fpls.2022.900347          |
| 83 | J | Yang, Weiwei; Cheng, Peng; Adams, Catharine A.; Zhang, Shuwu; Sun, Yuhuan; Yu, Hongwei; Wang, Fayuan                                                                                         | Effects of microplastics on plant growth and arbuscular mycorrhizal fungal communities in a soil spiked with ZnO nanoparticles                                                                   | Article |  | Soil Biol. Biochem.        | 2021 | 10.1016/j.soilbio.2021.108179     |
| 84 | J | Dimkpa, Christian O.; Latta, Drew E.; McLean, Joan E.; Britt, David W.; Boyanov, Maxim I.; Anderson, Anne J.                                                                                 | Fate of CuO and ZnO nano- and microparticles in the plant environment                                                                                                                            | Article |  | Environ. Sci. Technol.     | 2013 | 10.1021/es304736y                 |
| 85 | J | Mansoor, Nayyab; Younus, Ayesha; Jamil, Yasir; Shahid, Muhammad                                                                                                                              | Impact of nanosized and bulk ZnO on germination and early growth response of <i>Triticum aestivum</i>                                                                                            | Article |  | Pak. J. Agric. Sci.        | 2019 | 10.21162/PAKJAS/19.8544           |
| 86 | J | Li, Sen; Liu, Juan; Wang, Yibo; Gao, Yang; Zhang, Zhipeng; Xu, Jin; Xing, Guoming                                                                                                            | Comparative physiological and metabolomic analyses revealed that foliar spraying with zinc oxide and silica nanoparticles modulates metabolite profiles in cucumber ( <i>Cucumis sativus</i> L.) | Article |  | Food Energy Secur.         | 2021 | 10.1002/fes3.269                  |
| 87 | J | Tokarsky, Jonas; Kutlakova, Katerina Mamulova; Podlipna, Radka; Vanek, Tomas                                                                                                                 | Phytotoxicity of ZnO/kaolinite nanocomposite-is anchoring the right way to lower environmental risk?                                                                                             | Article |  | Environ. Sci. Pollut. Res. | 2019 | 10.1007/s11356-019-05529-9        |
| 88 | J | Molnar, Arpad; Papp, Mark; Kovacs, David Zoltan; Belteky, Peter; Olah, Dora; Feigl, Gabor; Szollosi, Reka; Razga, Zsolt; Ordog, Attila; Erdei, Laszlo; Ronavari,                             | Nitro-oxidative signalling induced by chemically synthesized zinc oxide nanoparticles (ZnO NPs) in <i>Brassica</i> species                                                                       | Article |  | Chemosphere                | 2020 | 10.1016/j.chemosphere.2020.126419 |

|    |   |                                                                                                                                                                           |                                                                                                                                                                                                     |         |  |                            |      |                                   |
|----|---|---------------------------------------------------------------------------------------------------------------------------------------------------------------------------|-----------------------------------------------------------------------------------------------------------------------------------------------------------------------------------------------------|---------|--|----------------------------|------|-----------------------------------|
|    |   | Andrea; Konya, Zoltan; Kolbert, Zsuzsanna                                                                                                                                 |                                                                                                                                                                                                     |         |  |                            |      |                                   |
| 89 | J | Ali, Shafaqat; Rizwan, Muhammad; Noureen, Shamaila; Anwar, Sarwat; Ali, Basharat; Naveed, Muhammad; Abd Allah, Elsayed Fathi; Alqarawi, Abdulaziz A.; Ahmad, Parvaiz      | Combined use of biochar and zinc oxide nanoparticle foliar spray improved the plant growth and decreased the cadmium accumulation in rice ( <i>Oryza sativa</i> L.) plant                           | Article |  | Environ. Sci. Pollut. Res. | 2019 | 10.1007/s11356-019-04554-y        |
| 90 | J | Chen, Juan; Liu, Xiang; Wang, Chao; Yin, Shan-Shan; Li, Xiu-Ling; Hu, Wen-Jun; Simon, Martin; Shen, Zhi-Jun; Xiao, Qiang; Chu, Cheng-Cai; Peng, Xin-Xiang; Zheng, Hai-Lei | Nitric oxide ameliorates zinc oxide nanoparticles-induced phytotoxicity in rice seedlings                                                                                                           | Article |  | J. Hazard. Mater.          | 2015 | 10.1016/j.jhazmat.2015.04.077     |
| 91 | J | Tirani, Maryam Mazaheri; Haghjou, Maryam Madadkar; Sulieman, Saad; Colville, Louise; Ismaili, Ahmad                                                                       | The influence of organic and inorganic chelators on the toxicity of bulk and nanoparticles of zinc oxide during germination and seedling growth of <i>Nicotiana tabacum</i> L.                      | Article |  | Plant Biosyst.             | 2019 | 10.1080/11263504.2018.1498402     |
| 92 | J | Jain, Navin; Bhargava, Arpit; Pareek, Vikram; Akhtar, Mohd. Sayeed; Panwar, Jitendra                                                                                      | Does seed size and surface anatomy play role in combating phytotoxicity of nanoparticles?                                                                                                           | Article |  | Ecotoxicology              | 2017 | 10.1007/s10646-017-1758-7         |
| 93 | J | Pishkar, Leila; Yousefi, Soheil; Iranbakhsh, Alireza                                                                                                                      | Foliar application of Zinc oxide nanoparticles alleviates cadmium toxicity in purslane by maintaining nutrients homeostasis and improving the activity of antioxidant enzymes and glyoxalase system | Article |  | Ecotoxicology              | 2022 | 10.1007/s10646-022-02533-7        |
| 94 | J | Oleszczuk, Patryk; Czech, Bozena; Konczak, Magdalena; Bogusz, Aleksandra; Siatecka, Anna; Godlewska, Paulina; Wiesner, Mark                                               | Impact of ZnO and ZnS nanoparticles in sewage sludge-amended soil on bacteria, plant and invertebrates                                                                                              | Article |  | Chemosphere                | 2019 | 10.1016/j.chemosphere.2019.124359 |
| 95 | J | Gomes, Alex Rodrigues; Matos, Leticia Paiva de; Guimara, Abraao Tiago Batista; Freitas, Italo                                                                             | Plant-ZnO nanoparticles interaction: An approach to improve guinea grass ( <i>Panicum maximum</i> ) productivity and evaluation of the impacts of its ingestion                                     | Article |  | J. Hazard. Mater.          | 2023 | 10.1016/j.jhazmat.2023.131173     |

|     |   |                                                                                                                                                                                                                                                                                                                                                                                               |                                                                                                                                               |         |  |                            |      |                               |
|-----|---|-----------------------------------------------------------------------------------------------------------------------------------------------------------------------------------------------------------------------------------------------------------------------------------------------------------------------------------------------------------------------------------------------|-----------------------------------------------------------------------------------------------------------------------------------------------|---------|--|----------------------------|------|-------------------------------|
|     |   | Nascimento; Luz, Thiarlen Marinho da; Silva, Abner Marcelino; Matos, Stenio Gonsalves da Silva; Rodrigues, Aline Sueli de Lima; Ferreira, Raissa de Oliveira; Islam, Abu Reza Md. Towfiqul; Rahman, Md. Mostafizur; Ragavendran, Chinnasamy; Kamaraj, Chinnaperumal; Mubarak, Nabisab Mujawar; Arias, Andres Hugo; Gomes, Paula Cristine Silva; Silva, Fabiano Guimaraes; Malafaia, Guilherme | by freshwater teleost fish                                                                                                                    |         |  |                            |      |                               |
| 96  | J | Zafar, Hira; Abbasi, Bilal Haider; Zia, Muhammad                                                                                                                                                                                                                                                                                                                                              | Physiological and antioxidative response of <i>Brassica nigra</i> (L.) to ZnO nanoparticles grown in culture media and soil                   | Article |  | Toxicol Environ. Chem.     | 2019 | 10.1080/02772248.2019.1691555 |
| 97  | J | Elemike, Elias E.; Onwudiwe, Damian C.; Ogeleka, Doris F.; Obasi, Esther C.                                                                                                                                                                                                                                                                                                                   | Biomediated cellulose-Ag-ZnO nanocomposites and their ecotoxicological assessment using onion bulb plant                                      | Article |  | J. Clust. Sci.             | 2021 | 10.1007/s10876-020-01826-3    |
| 98  | J | Haisel, Daniel; Cyrusova, Tereza; Vanek, Tomas; Podlipna, Radka                                                                                                                                                                                                                                                                                                                               | The effect of nanoparticles on the photosynthetic pigments in cadmiumzinc interactions                                                        | Article |  | Environ. Sci. Pollut. Res. | 2019 | 10.1007/s11356-018-04060-7    |
| 99  | J | Dogaroglu, Zeynep G.; Koleli, Nurcan                                                                                                                                                                                                                                                                                                                                                          | TiO <sub>2</sub> and ZnO nanoparticles toxicity in barley ( <i>Hordeum vulgare</i> L.)                                                        | Article |  | Clean-Soil Air Water       | 2017 | 10.1002/clen.201700096        |
| 100 | J | Basit, Farwa; Shahid, Muhammad; Abbas, Saghir; Naqqash, Tahir; Akram, Muhammad Sohail; Tahir, Muhammad; Azeem, Muhammad; Cai, Yibei; Jia, Shuhan; Hu, Jin; Liang, Xinqiang; Guan, Yajing                                                                                                                                                                                                      | Protective role of ZnO nanoparticles in soybean seedlings growth and stress management under Cr-enriched conditions                           | Article |  | Plant Growth Regul.        | 2023 | 10.1007/s10725-023-00965-7    |
| 101 | J | Dimkpa, Christian O.; Hansen, Trevor; Stewart, Jacob; McLean, Joan E.; Britt, David W.; Anderson, Anne J.                                                                                                                                                                                                                                                                                     | ZnO nanoparticles and root colonization by a beneficial pseudomonad influence essential metal responses in bean ( <i>Phaseolus vulgaris</i> ) | Article |  | Nanotoxicology             | 2015 | 10.3109/17435390.2014.900583  |

|     |   |                                                                                                                                                                                                                                                                                                                                              |                                                                                                                                                                         |         |  |                               |      |                                 |
|-----|---|----------------------------------------------------------------------------------------------------------------------------------------------------------------------------------------------------------------------------------------------------------------------------------------------------------------------------------------------|-------------------------------------------------------------------------------------------------------------------------------------------------------------------------|---------|--|-------------------------------|------|---------------------------------|
| 102 | J | Raliya, Ramesh; Nair, Remya; Chavalmane, Sanmathi; Wang, Wei-Ning; Biswas, Pratim                                                                                                                                                                                                                                                            | Mechanistic evaluation of translocation and physiological impact of titanium dioxide and zinc oxide nanoparticles on the tomato ( <i>Solanum lycopersicum</i> L.) plant | Article |  | Metallomics                   | 2015 | 10.1039/c5mt00168d              |
| 103 | J | Zafar, Hira; Aziz, Tehmina; Khan, Bakhtawar; Mannan, Abdul; Rehman, Riaz Ur; Zia, Muhammad                                                                                                                                                                                                                                                   | CuO and ZnO nanoparticle application in synthetic soil modulates morphology, nutritional contents, and metal analysis of <i>Brassica nigra</i>                          | Article |  | ACS Omega                     | 2020 | 10.1021/acsomega.0c00030        |
| 104 | J | Leopold, Loredana F.; Coman, Cristina; Clapa, Doina; Oprea, Ioana; Toma, Alexandra; Iancu, Stefania D.; Barbu-Tudoran, Lucian; Suciu, Maria; Ciorita, Alexandra; Cadis, Adrian I.; Muresan, Laura Elena; Perhaita, Ioana Mihaela; Copolovici, Lucian; Copolovici, Dana M.; Copaciu, Florina; Leopold, Nicolae; Vodnar, Dan C.; Coman, Vasile | The effect of 100-200 nm ZnO and TiO <sub>2</sub> nanoparticles on the in vitro-grown soybean plants                                                                    | Article |  | Colloid Surf. B-Biointerfaces | 2022 | 10.1016/j.colsurfb.2022.112536  |
| 105 | J | Kim, Sung Hoon; Bae, Sujin; Hwang, Yu Sik                                                                                                                                                                                                                                                                                                    | Comparative bioaccumulation, translocation, and phytotoxicity of metal oxide nanoparticles and metal ions in soil-crop system                                           | Article |  | Sci. Total Environ.           | 2023 | 10.1016/j.scitotenv.2022.158938 |
| 106 | J | Salehi, Hajar; Diego, Nuria De; Rad, Abdolkarim Chehregani; Benjamin, Jenifer Joseph; Trevisan, Marco; Lucini, Luigi                                                                                                                                                                                                                         | Exogenous application of ZnO nanoparticles and ZnSO <sub>4</sub> distinctly influence the metabolic response in <i>Phaseolus vulgaris</i> L.                            | Article |  | Sci. Total Environ.           | 2021 | 10.1016/j.scitotenv.2021.146331 |
| 107 | J | Shafiq, Tayyab; Yasmin, Humaira; Shah, Zafar Abbas; Nosheen, Asia; Ahmad, Parvaiz; Kaushik, Prashant; Ahmad, Ajaz                                                                                                                                                                                                                            | Titanium oxide and zinc oxide nanoparticles in combination with cadmium tolerant <i>Bacillus pumilus</i> ameliorates the cadmium toxicity in maize                      | Article |  | Antioxidants                  | 2022 | 10.3390/antiox11112156          |
| 108 | J | Jahan, Shanaz; Alias, Yatimah Binti; Bin Abu Bakar, Ahmad Farid; Bin Yusoff, Ismail                                                                                                                                                                                                                                                          | Toxicity evaluation of ZnO and TiO <sub>2</sub> nanomaterials in hydroponic red bean ( <i>Vigna angularis</i> ) plant: Physiology, biochemistry and kinetic transport   | Article |  | J. Environ. Sci.              | 2018 | 10.1016/j.jes.2017.12.022       |

|     |   |                                                                                                                                                                           |                                                                                                                                                                      |         |  |                           |      |                                 |
|-----|---|---------------------------------------------------------------------------------------------------------------------------------------------------------------------------|----------------------------------------------------------------------------------------------------------------------------------------------------------------------|---------|--|---------------------------|------|---------------------------------|
| 109 | J | Singh, Divya; Kumar, Arun                                                                                                                                                 | Investigating long-term effect of nanoparticles on growth of <i>Raphanus sativus</i> plants: A trans-generational study                                              | Article |  | Ecotoxicology             | 2018 | 10.1007/s10646-017-1867-3       |
| 110 | J | Faizan, Mohammad; Bhat, Javaid Akhter; Hessini, Kamel; Yu, Fangyuan; Ahmad, Parvaiz                                                                                       | Zinc oxide nanoparticles alleviates the adverse effects of cadmium stress on <i>Oryza sativa</i> via modulation of the photosynthesis and antioxidant defense system | Article |  | Ecotox. Environ. Safe.    | 2021 | 10.1016/j.ecoenv.2021.112401    |
| 111 | J | Sun, Hongda; Li, Zhuofan; Wen, Jinyu; Zhou, Qianqian; Gong, Yafang; Zhao, Xiaohan; Mao, Hui                                                                               | Co-exposure of maize to polyethylene microplastics and ZnO nanoparticles: Impact on growth, fate, and interaction                                                    | Article |  | Sci. Total Environ.       | 2023 | 10.1016/j.scitotenv.2023.162705 |
| 112 | J | Salih, Abdalrhaman M.; Al-Qurainy, Fahad; Khan, Salim; Tarroum, Mohamed; Nadeem, Mohammad; Shaikhaldein, Hassan O.; Gaafar, Abdel-Rhman Zakaria; Alfarraj, Norah S.       | Biosynthesis of zinc oxide nanoparticles using <i>Phoenix dactylifera</i> and their effect on biomass and phytochemical compounds in <i>Juniperus procera</i>        | Article |  | Sci Rep                   | 2021 | 10.1038/s41598-021-98607-3      |
| 113 | J | Chen, Jing; Dou, Runzhi; Yang, Zhongzhou; You, Tingting; Gao, Xiang; Wang, Li                                                                                             | Phytotoxicity and bioaccumulation of zinc oxide nanoparticles in rice ( <i>Oryza sativa</i> L.)                                                                      | Article |  | Plant Physiol. Biochem.   | 2018 | 10.1016/j.plaphy.2018.08.019    |
| 114 | J | Faizan, Mohammad; Faraz, Ahmad; Mir, Anayat Rasool; Hayat, Shamsul                                                                                                        | Role of zinc oxide nanoparticles in countering negative effects generated by cadmium in <i>Lycopersicon esculentum</i>                                               | Article |  | J. Plant Growth Regul.    | 2021 | 10.1007/s00344-019-10059-2      |
| 115 | J | Zhao, Lijuan; Sun, Youping; Hernandez-Viezcas, Jose A.; Servin, Alia D.; Hong, Jie; Niu, Genhua; Peralta-Videa, Jose R.; Duarte-Gardea, Maria; Gardea-Torresdey, Jorge L. | Influence of CeO <sub>2</sub> and ZnO nanoparticles on cucumber physiological markers and bioaccumulation of Ce and Zn: A life cycle study                           | Article |  | J. Agric. Food Chem.      | 2013 | 10.1021/jf404328e               |
| 116 | J | Zou, Congming; Lu, Tianquan; Wang, Ruting; Xu, Peng; Jing, Yifen; Wang, Ruling; Xu, Jin; Wan, Jinpeng                                                                     | Comparative physiological and metabolomic analyses reveal that Fe <sub>3</sub> O <sub>4</sub> and ZnO nanoparticles alleviate Cd toxicity in tobacco                 | Article |  | J. Nanobiotechnol.        | 2022 | 10.1186/s12951-022-01509-3      |
| 117 | J | Kim, Sunghyun; Sin, Hyunjoo; Lee, Sooyeon; Lee, Insook                                                                                                                    | Influence of metal oxide particles on soil enzyme activity and bioaccumulation of two plants                                                                         | Article |  | J. Microbiol. Biotechnol. | 2013 | 10.4014/jmb.1304.04084          |



|     |   |                                                                                                                                                                |                                                                                                                                                          |         |  |                         |      |                               |
|-----|---|----------------------------------------------------------------------------------------------------------------------------------------------------------------|----------------------------------------------------------------------------------------------------------------------------------------------------------|---------|--|-------------------------|------|-------------------------------|
| 118 | J | Thwala, Melusi; Klaine, Stephen J.; Musee, Ndeke                                                                                                               | Interactions of metal-based engineered nanoparticles with aquatic higher plants: A review of the state of current knowledge                              | Review  |  | Environ. Toxicol. Chem. | 2016 | 10.1002/etc.3364              |
| 119 | J | Srivastav, Akansha; Ganjewala, Deepak; Singhal, Rakesh Kumar; Rajput, Vishnu D.; Minkina, Tatiana; Voloshina, Marina; Srivastava, Sudhakar; Shrivastava, Manoj | Effect of ZnO nanoparticles on growth and biochemical responses of wheat and maize                                                                       | Article |  | Plants-Basel            | 2021 | 10.3390/plants10122556        |
| 120 | J | Batista de Souza, Adriana Alves; Araujo do Nascimento, Clistenes Williams; de Souza, Edivan Rodrigues                                                          | Mineral composition, chlorophyll fluorescence and zinc biofortification in <i>Vigna unguiculata</i> fertilized with bulk and nanoparticulate zinc oxides | Article |  | Acta Physiol. Plant.    | 2021 | 10.1007/s11738-021-03333-y    |
| 121 | J | Wang, Peng; Menzies, Neal W.; Lombi, Enzo; McKenna, Brigid A.; Johannessen, Bernt; Glover, Chris J.; Kappen, Peter; Kopittke, Peter M.                         | Fate of ZnO nanoparticles in soils and cowpea ( <i>Vigna unguiculata</i> )                                                                               | Article |  | Environ. Sci. Technol.  | 2013 | 10.1021/es403466p             |
| 122 | J | Abou-Zeid, Hanan Mahmoud; Ismail, Ghada Saber Mohamed; Abdel-Latif, Salwa Ahmed                                                                                | Influence of seed priming with ZnO nanoparticles on the salt-induced damages in wheat ( <i>Triticum aestivum</i> L.) plants                              | Article |  | J. Plant Nutr.          | 2021 | 10.1080/01904167.2020.1849288 |
| 123 | J | Zhu, Jiahui; Zou, Ziheng; Shen, Yu; Li, Jinfeng; Shi, Shengnan; Han, Shuwen; Zhan, Xinhua                                                                      | Increased ZnO nanoparticle toxicity to wheat upon co-exposure to phenanthrene                                                                            | Article |  | Environ. Pollut.        | 2019 | 10.1016/j.envpol.2019.01.046  |
| 124 | J | Sun, Zhiqiang; Xiong, Tiantian; Zhang, Ting; Wang, Nanfang; Chen, Da; Li, Shaoshan                                                                             | Influences of zinc oxide nanoparticles on <i>Allium cepa</i> root cells and the primary cause of phytotoxicity                                           | Article |  | Ecotoxicology           | 2019 | 10.1007/s10646-018-2010-9     |
| 125 | J | Guo, Junhong; Li, Shuxin; Brestic, Marian; Li, Na; Zhang, Peng; Liu, Lei; Li, Xiangnan                                                                         | Modulations in protein phosphorylation explain the physiological responses of barley ( <i>Hordeum vulgare</i> ) to nanoplastics and ZnO nanoparticles    | Article |  | J. Hazard. Mater.       | 2023 | 10.1016/j.jhazmat.2022.130196 |
| 126 | J | Azarin, Kirill; Usatov, Alexander; Minkina, Tatiana; Duplii, Nadezhda; Kasyanova, Alexandra;                                                                   | Effects of bulk and nano-ZnO particles on functioning of photosynthetic apparatus in barley ( <i>Hordeum vulgare</i> L.)                                 | Article |  | Environ. Res.           | 2023 | 10.1016/j.envres.2022.114748  |

|     |   |                                                                                                                                              |                                                                                                                                                                              |                       |  |                               |      |                                 |
|-----|---|----------------------------------------------------------------------------------------------------------------------------------------------|------------------------------------------------------------------------------------------------------------------------------------------------------------------------------|-----------------------|--|-------------------------------|------|---------------------------------|
|     |   | Fedorenko, Aleksei;<br>Khachumov, Vladimir;<br>Mandzhieva, Saglara;<br>Rajput, Vishnu D.                                                     |                                                                                                                                                                              |                       |  |                               |      |                                 |
| 127 | J | Torbati, Samaneh; Khataee, Alireza; Saadi, Shabnam                                                                                           | Comparative phytotoxicity of undoped and Er-doped ZnO nanoparticles on <i>Lemna minor</i> L.: Changes in plant physiological responses                                       | Article               |  | Turk. J. Biol.                | 2017 | 10.3906/biy-1611-27             |
| 128 | J | Skiba, Elzbieta;<br>Michlewska, Sylwia;<br>Pietrzak, Monika; Wolf, Wojciech M.                                                               | Additive interactions of nanoparticulate ZnO with copper, manganese and iron in <i>Pisum sativum</i> L., a hydroponic study                                                  | Article               |  | Sci Rep                       | 2020 | 10.1038/s41598-020-70303-8      |
| 129 | J | Garcia-Gomez, Concepcion; Obrador, Ana; Gonzalez, Demetrio; Babin, Mar; Dolores Fernandez, Maria                                             | Comparative effect of ZnO NPs, ZnO bulk and ZnSO <sub>4</sub> in the antioxidant defences of two plant species growing in two agricultural soils under greenhouse conditions | Article               |  | Sci. Total Environ.           | 2017 | 10.1016/j.scitotenv.2017.02.153 |
| 130 | J | Yoshihara, Shizue;<br>Yamamoto, Kasumi;<br>Nakajima, Yoshino; Takeda, Satomi;<br>Kurahashi, Kensuke; Tokumoto, Hayato                        | Absorption of zinc ions dissolved from zinc oxide nanoparticles in the tobacco callus improves plant productivity                                                            | Article               |  | Plant Cell Tissue Organ Cult. | 2019 | 10.1007/s11240-019-01636-0      |
| 131 | J | Akhtar, Nazneen; Khan, Sehresh; Rehman, Shafiq Ur; Rehman, Zia Ur; Khatoon, Amana; Rha, Eui Shik; Jamil, Muhammad                            | Synergistic effects of zinc oxide nanoparticles and bacteria reduce heavy metals toxicity in rice ( <i>Oryza sativa</i> L.) plant                                            | Article               |  | Toxics                        | 2021 | 10.3390/toxics9050113           |
| 132 | J | Salam, Abdul; Khan, Ali Raza; Liu, Li; Yang, Shuaiqi; Azhar, Wardah; Ulhassan, Zaid; Zeeshan, Muhammad; Wu, Junyu; Fan, Xingming; Gan, Yinbo | Seed priming with zinc oxide nanoparticles downplayed ultrastructural damage and improved photosynthetic apparatus in maize under cobalt stress                              | Article               |  | J. Hazard. Mater.             | 2022 | 10.1016/j.jhazmat.2021.127021   |
| 133 | J | Rexlin, J.; Vijayakumar, S.; Nilavukkarasi, M.; Vidhya, E.; Alharthi, Nahed S.; Sajjad, Maryium; Punitha, V. N.; Praseetha, P. K.            | Bioengineered ZnO nanoparticles as a nano priming agent in <i>Cyamopsis tetragonoloba</i> (L.) Taub. to improve yield and disease resistance                                 | Article; Early Access |  | Appl. Nanosci.                | 2022 | 10.1007/s13204-022-02526-2      |
| 134 | J | Lv, Jitao.; Zhang, Shuzhen.; Luo, Lei.; Zhang, Jing.; Yang, Ke.; Christie, Peter.                                                            | Accumulation, speciation and uptake pathway of ZnO nanoparticles in maize                                                                                                    | Article               |  | Environ. Sci.: Nano           | 2015 | 10.1039/c4en00064a              |

|     |   |                                                                                                                            |                                                                                                                                                                |                       |                                         |                            |      |                                 |
|-----|---|----------------------------------------------------------------------------------------------------------------------------|----------------------------------------------------------------------------------------------------------------------------------------------------------------|-----------------------|-----------------------------------------|----------------------------|------|---------------------------------|
| 135 | J | Farghaly, Fatma A.; Radi, Abeer A.; Al-Kahtany, Fatma A.; Hamada, Afaf M.                                                  | Impacts of zinc oxide nano and bulk particles on redox-enzymes of <i>the Punica granatum</i> callus                                                            | Article               |                                         | Sci Rep                    | 2020 | 10.1038/s41598-020-76664-4      |
| 136 | J | Chen, Xiaolin; O'Halloran, John; Jansen, Marcel A. K.                                                                      | Time matters: The toxicity of zinc oxide nanoparticles to <i>Lemna minor</i> L. increases with exposure time                                                   | Article               |                                         | Water Air Soil Pollut.     | 2018 | 10.1007/s11270-018-3759-4       |
| 137 | J | Watson, Jean-Luc; Fang, Tommy; Dimkpa, Christian O.; Britt, David W.; McLean, Joan E.; Jacobson, Astrid; Anderson, Anne J. | The phytotoxicity of ZnO nanoparticles on wheat varies with soil properties                                                                                    | Article               |                                         | Biometals                  | 2015 | 10.1007/s10534-014-9806-8       |
| 138 | J | Ahmad, Muhammad Arslan; Javed, Rabia; Adeel, Muhammad; Rizwan, Muhammad; Ao, Qiang; Yang, Yuesuo                           | Engineered ZnO and CuO nanoparticles ameliorate morphological and biochemical response in tissue culture regenerants of candyleaf ( <i>Stevia rebaudiana</i> ) | Article               |                                         | Molecules                  | 2020 | 10.3390/molecules25061356       |
| 139 | J | Lee, Sooyeon; Chung, Hyein; Kim, Saeyon; Lee, Insook                                                                       | The genotoxic effect of ZnO and CuO nanoparticles on early growth of buckwheat, <i>fagopyrum esculentum</i>                                                    | Article               |                                         | Water Air Soil Pollut.     | 2013 | 10.1007/s11270-013-1668-0       |
| 140 | J | Sun, Hongda; Guo, Wei; Zhou, Qianqian; Gong, Yafang; Lv, Zhiyuan; Wang, Quan; Mao, Hui; Kopittke, Peter M.                 | Uptake, transformation, and environmental impact of zinc oxide nanoparticles in a soil-wheat system                                                            | Article               |                                         | Sci. Total Environ.        | 2022 | 10.1016/j.scitotenv.2022.159307 |
| 141 | J | Mohamed, Ekram Abdelhaliem; Harbi, Hanan Fahad A. L.; Aref, Nagwa                                                          | Radioprotective efficacy of zinc oxide nanoparticles on gamma-ray-induced nuclear DNA damage in <i>Vicia faba</i> L. as evaluated by DNA bioassays             | Article               |                                         | J. Radiat. Res. Appl. Sci. | 2019 | 10.1080/16878507.2019.1690798   |
| 142 | J | Lv, Zhiyuan; Sun, Hongda; Du, Wei; Li, Ruoyi; Mao, Hui; Kopittke, Peter M.                                                 | Interaction of different-sized ZnO nanoparticles with maize ( <i>Zea mays</i> ) Accumulation, biotransformation and phytotoxicity                              | Article               |                                         | Sci. Total Environ.        | 2021 | 10.1016/j.scitotenv.2021.148927 |
| 143 | C | Awasthi, Anjali; Bansal, Sonu; Jangir, Lokesh Kumar; Awasthi, Garima; Awasthi, Kumud Kant; Awasthi, Kamalendra             | Effect of ZnO nanoparticles on germination of <i>Triticum aestivum</i> seeds                                                                                   | Proceedings Paper     | 2nd Conference on Soft Materials (ICSM) | Macromol. Symp.            | 2017 | 10.1002/masy.201700043          |
| 144 | J | Kumari, Arpna; Chokheli, Vasily A.; Lysenko, Vladimir S.; Mandzhieva, Saglara S.; Minkina, Tatiana M.; Mazarji, Mahmoud;   | Genotoxic and morpho-physiological responses of ZnO macro- and nano-forms in plants                                                                            | Article; Early Access |                                         | Environ. Geochem. Health   | 2022 | 10.1007/s10653-022-01428-0      |

|     |   |                                                                                                                                                 |                                                                                                                                                                                                                        |                       |  |                            |      |                               |
|-----|---|-------------------------------------------------------------------------------------------------------------------------------------------------|------------------------------------------------------------------------------------------------------------------------------------------------------------------------------------------------------------------------|-----------------------|--|----------------------------|------|-------------------------------|
|     |   | Rajput, Vishnu D.; Shuvaeva, Victoria A.; Sushkova, Svetlana S.; Barakhov, Anatoly                                                              |                                                                                                                                                                                                                        |                       |  |                            |      |                               |
| 145 | J | Sun, Yan; Mfarrej, Manar Fawzi Bani; Song, Xiaojun; Ma, Jing; Min, Bolin; Chen, Fu                                                              | New insights in to the ameliorative effects of zinc and iron oxide nanoparticles to arsenic stressed spinach ( <i>Spinacia oleracea</i> L.)                                                                            | Article               |  | Plant Physiol. Biochem.    | 2023 | 10.1016/j.plaphy.2023.107715  |
| 146 | J | Nemcek, Lucia; Sebesta, Martin; Urik, Martin; Bujdos, Marek; Dobrocka, Edmund; Vavra, Ivo                                                       | Impact of bulk ZnO, ZnO nanoparticles and dissolved Zn on early growth stages of barley-a pot experiment                                                                                                               | Article               |  | Plants-Basel               | 2020 | 10.3390/plants9101365         |
| 147 | J | Zhang, Wei; Long, Jinghua; Li, Jie; Zhang, Meng; Xiao, Guoliang; Ye, Xingyin; Chang, Wenjing; Zeng, Hui                                         | Impact of ZnO nanoparticles on Cd toxicity and bioaccumulation in rice ( <i>Oryza sativa</i> L.)                                                                                                                       | Article               |  | Environ. Sci. Pollut. Res. | 2019 | 10.1007/s11356-019-05551-x    |
| 148 | J | Petrova, Sarka; Soudek, Petr                                                                                                                    | Ecotoxicity study of additives composed of zinc and boron                                                                                                                                                              | Article               |  | Toxics                     | 2022 | 10.3390/toxics10120795        |
| 149 | J | Zoufan, Parzhak; Baroonian, Maryam; Zargar, Behrooz                                                                                             | ZnO nanoparticles-induced oxidative stress in <i>Chenopodium murale</i> L, Zn uptake, and accumulation under hydroponic culture                                                                                        | Article               |  | Environ. Sci. Pollut. Res. | 2020 | 10.1007/s11356-020-07735-2    |
| 150 | J | Ghouri, Fozia; Shahid, Munazzam Jawad; Liu, Jingwen; Lai, Mingyu; Sun, Lixia; Wu, Jinwen; Liu, Xiangdong; Ali, Shafaqat; Shahid, Muhammad Qasim | Polyploidy and zinc oxide nanoparticles alleviated Cd toxicity in rice by modulating oxidative stress and expression levels of sucrose and metal-transporter genes                                                     | Article               |  | J. Hazard. Mater.          | 2023 | 10.1016/j.jhazmat.2023.130991 |
| 151 | J | Iqbal, I.; Bhatti, K. H.                                                                                                                        | The combined effect of ZnO nanoparticles and toxicity of heavy metals (arsenic and chromium) on the morphological, biochemical attributes of wheat ( <i>Triticum aestivum</i> L.) as well as soil and water properties | Article; Early Access |  | Appl. Ecol. Environ. Res.  | 2021 | 10.15666/aecer/2004_28972912  |
| 152 | J | Raigond, P.; Raigond, B.; Kaundal, B.; Singh, B.; Joshi, A.; Dutt, S.                                                                           | Effect of zinc nanoparticles on antioxidative system of potato plants                                                                                                                                                  | Article               |  | J. Environ. Biol.          | 2017 | 10.22438/jeb/38/3/MS-209      |
| 153 | J | Singh, Jagpreet; Kumar, Sumit; Alok, Anshu; Upadhyay, Santosh Kumar; Rawat, Mohit; Tsang, Daniel C. W.; Bolan, Nanthi; Kim,                     | The potential of green synthesized zinc oxide nanoparticles as nutrient source for plant growth                                                                                                                        | Article               |  | J. Clean Prod.             | 2019 | 10.1016/j.jclepro.2019.01.018 |

|     |   |                                                                                                                                                                                                              |                                                                                                                                                                                                                                |         |  |                            |      |                                   |
|-----|---|--------------------------------------------------------------------------------------------------------------------------------------------------------------------------------------------------------------|--------------------------------------------------------------------------------------------------------------------------------------------------------------------------------------------------------------------------------|---------|--|----------------------------|------|-----------------------------------|
|     |   | Ki-Hyun                                                                                                                                                                                                      |                                                                                                                                                                                                                                |         |  |                            |      |                                   |
| 154 | J | Kouhi, Seyed Mousa Mousavi; Lahouti, Mehrdad; Ganjeali, Ali; Entezari, Mohammad H.                                                                                                                           | Comparative effects of ZnO nanoparticles, ZnO bulk particles, and Zn <sup>2+</sup> on brassica napus after long-term exposure: Changes in growth, biochemical compounds, antioxidant enzyme activities, and Zn bioaccumulation | Article |  | Water Air Soil Pollut.     | 2015 | 10.1007/s11270-015-2628-7         |
| 155 | J | Wang, Xiaoxuan; Sun, Wenjie; Zhang, Sha; Sharifan, Hamidreza; Ma, Xingmao                                                                                                                                    | Elucidating the effects of cerium oxide nanoparticles and zinc oxide nanoparticles on arsenic uptake and speciation in rice ( <i>Oryza sativa</i> ) in a hydroponic system                                                     | Article |  | Environ. Sci. Technol.     | 2018 | 10.1021/acs.est.8b01664           |
| 156 | J | Hashemi, Shahla; Asrar, Zahra; Pourseyedi, Shahram; Nademejad, Nazi                                                                                                                                          | Investigation of ZnO nanoparticles on proline, anthocyanin contents and photosynthetic pigments and lipid peroxidation in the soybean                                                                                          | Article |  | IET Nanobiotechnol.        | 2019 | 10.1049/iet-nbt.2018.5212         |
| 157 | J | Sun, Hongda; Peng, Qingqing; Guo, Jiao; Zhang, Haoyue; Bai, Junrui; Mao, Hui                                                                                                                                 | Effects of short-term soil exposure of different doses of ZnO nanoparticles on the soil environment and the growth and nitrogen fixation of alfalfa                                                                            | Article |  | Environ. Pollut.           | 2022 | 10.1016/j.envpol.2022.119817      |
| 158 | J | Hong, Mo; Gong, Ji-Lai; Cao, Wei-Cheng; Fang, Rong; Cai, Zhe; Ye, Jun; Chen, Zeng-Ping; Tang, Wang-Wang                                                                                                      | The combined toxicity and mechanism of multi-walled carbon nanotubes and nano zinc oxide toward the cabbage                                                                                                                    | Article |  | Environ. Sci. Pollut. Res. | 2022 | 10.1007/s11356-021-15857-4        |
| 159 | J | Azarin, Kirill; Usatov, Alexander; Minkina, Tatiana; Plotnikov, Andrey; Kasyanova, Alexandra; Fedorenko, Aleksei; Duplii, Nadezhda; Vechkanov, Evgeniy; Rajput, Vishnu D.; Mandzhieva, Saglara; Alamri, Saud | Effects of ZnO nanoparticles and its bulk form on growth, antioxidant defense system and expression of oxidative stress related genes in <i>Hordeum vulgare</i> L                                                              | Article |  | Chemosphere                | 2022 | 10.1016/j.chemosphere.2021.132167 |
| 160 | J | Landa, Premysl                                                                                                                                                                                               | Positive effects of metallic nanoparticles on plants: Overview of involved mechanisms                                                                                                                                          | Review  |  | Plant Physiol. Biochem.    | 2021 | 10.1016/j.plaphy.2021.01.039      |
| 161 | J | Baskar, Venkidasamy; Safia, Nayeem; Sree Preethy, Kuppuraj; Dhivya, Selvaraj;                                                                                                                                | A comparative study of phytotoxic effects of metal oxide (CuO, ZnO and NiO) nanoparticles on in-vitro grown                                                                                                                    | Article |  | Plant Biosyst.             | 2021 | 10.1080/11263504.2020.1753843     |

|     |   |                                                                                                                                                                                                                                                                                    |                                                                                                                                                                                               |         |  |                               |      |                                 |
|-----|---|------------------------------------------------------------------------------------------------------------------------------------------------------------------------------------------------------------------------------------------------------------------------------------|-----------------------------------------------------------------------------------------------------------------------------------------------------------------------------------------------|---------|--|-------------------------------|------|---------------------------------|
|     |   | Thiruvengadam, Muthu; Sathishkumar, Ramalingam                                                                                                                                                                                                                                     | <i>Abelmoschus esculentus</i>                                                                                                                                                                 |         |  |                               |      |                                 |
| 162 | J | Emamverdian, Abolghassem; Hasanuzzaman, Mirza; Ding, Yulong; Barker, James; Mokhberdoran, Farzad; Liu, Guohua                                                                                                                                                                      | Zinc oxide nanoparticles improve <i>Pleioblastus pygmaeus</i> plant tolerance to arsenic and mercury by stimulating antioxidant defense and reducing the metal accumulation and translocation | Article |  | Front. Plant Sci.             | 2022 | 10.3389/fpls.2022.841501        |
| 163 | J | Peng, Cheng; Tong, Hong; Shen, Chensi; Sun, Lijuan; Yuan, Peng; He, Miao; Shi, Jiyan                                                                                                                                                                                               | Bioavailability and translocation of metal oxide nanoparticles in the soil-rice plant system                                                                                                  | Article |  | Sci. Total Environ.           | 2020 | 10.1016/j.scitotenv.2020.136662 |
| 164 | J | Ruiz-Torres, Norma; Flores-Naveda, Antonio; Barriga-Castro, Enrique Diaz; Camposeco-Montejo, Neymar; Ramirez-Barron, Sonia; Borrego-Escalante, Fernando; Nino-Medina, Guillermo; Hernandez-Juarez, Agustin; Garza-Alonso, Carlos; Rodriguez-Salinas, Pablo; Garcia-Lopez, Josue I. | Zinc oxide nanoparticles and zinc sulfate impact physiological parameters and boosts lipid peroxidation in soil grown coriander plants ( <i>Coriandrum sativum</i> )                          | Article |  | Molecules                     | 2021 | 10.3390/molecules26071998       |
| 165 | J | Hezaveh, Torfeh Akhavan; Pourakbar, Latifeh; Rahmani, Fatemeh; Alipour, Hadi                                                                                                                                                                                                       | Interactive effects of salinity and ZnO nanoparticles on physiological and molecular parameters of rapeseed ( <i>Brassica napus</i> L.)                                                       | Article |  | Commun. Soil Sci. Plant Anal. | 2019 | 10.1080/00103624.2019.1589481   |
| 166 | J | Zarate-Cruz, Griselda S.; Zavaleta-Mancera, Hilda A.; Alarcon, Alejandro; Jimenez-Garcia, Luis F.                                                                                                                                                                                  | Phytotoxicity of ZnO nanoparticles on the aquatic fern <i>Azolla Filiculoides</i> Lam                                                                                                         | Article |  | Agrociencia                   | 2016 |                                 |
| 167 | J | Wojcieszek, Justyna; Jimenez-Lamana, Javier; Bierla, Katarzyna; Asztemborska, Monika; Ruzik, Lena; Jarosz, Maciej; Szpunar, Joanna                                                                                                                                                 | Elucidation of the fate of zinc in model plants using single particle ICP-MS and ESI tandem MS                                                                                                | Article |  | J. Anal. At. Spectrom.        | 2019 | 10.1039/c8ja00390d              |
| 168 | J | Zhang, Hong.; Chen, Zhu.; Huang, Qing.                                                                                                                                                                                                                                             | Study of the toxicity of ZnO nanoparticles to <i>Chlorella sorokiniana</i> under the influence of phosphate: Spectroscopic quantification,                                                    | Article |  | Environ. Sci.: Nano           | 2020 | 10.1039/c9en01464k              |

|     |   |                                                                                                                                                                                               |                                                                                                                                                                             |         |  |                                 |      |                                          |
|-----|---|-----------------------------------------------------------------------------------------------------------------------------------------------------------------------------------------------|-----------------------------------------------------------------------------------------------------------------------------------------------------------------------------|---------|--|---------------------------------|------|------------------------------------------|
|     |   |                                                                                                                                                                                               | photosynthetic efficiency and gene expression analysis                                                                                                                      |         |  |                                 |      |                                          |
| 169 | J | Zhang Lan-lan; Xu Chang-shan; Chen Ze-lin; Shao Hai-ling; Zhang Hai-jiao; Qiao Jin                                                                                                            | Distribution of aloe-emodin and its color and spectral properties under the influence of ZnO NPs                                                                            | Article |  | Spectrosc. Spectr. Anal.        | 2018 | 10.3964/j.issn.1000-0593(2018)03-0883-07 |
| 170 | J | Faizan, Mohammad; Bhat, Javaid Akhter; Noureldeen, Ahmed; Ahmad, Parvaiz; Yu, Fangyuan                                                                                                        | Zinc oxide nanoparticles and 24-epibrassinolide alleviates Cu toxicity in tomato by regulating ROS scavenging, stomatal movement and photosynthesis                         | Article |  | Ecotox. Environ. Safe.          | 2021 | 10.1016/j.ecoenv.2021.112293             |
| 171 | J | Wan, Jinpeng.; Wang, Ruling.; Bai, Hanrui.; Wang, Yibo.; Xu, Jin.                                                                                                                             | Comparative physiological and metabolomics analysis reveals that single-walled carbon nanohorns and ZnO nanoparticles affect salt tolerance in <i>Sophora alopecuroides</i> | Article |  | Environ. Sci.: Nano             | 2020 | 10.1039/d0en00582g                       |
| 172 | J | Caldelas, C.; Guri, R.; Araus, J. L.; Sorolla, A.                                                                                                                                             | Effect of ZnO nanoparticles on Zn, Cu, and Pb dissolution in a green bioretention system for urban stormwater remediation                                                   | Article |  | Chemosphere                     | 2021 | 10.1016/j.chemosphere.2021.131045        |
| 173 | J | Khoshgoftarmanesh, Amir Hossein; Markarian, Shakeh                                                                                                                                            | Antioxidant response of wheat to tire rubber ash and ZnO nanoparticles and ionic zinc exposure in nutrient solution culture                                                 | Article |  | Acta Physiol. Plant.            | 2022 | 10.1007/s11738-022-03384-9               |
| 174 | J | Xiao, Yunmu; Li, Yong; Shi, Yang; Li, Ziqian; Zhang, Xuyuan; Liu, Ting; Farooq, Taimoor Hassan; Pan, Yuliang; Chen, Xiaoyong; Yan, Wende                                                      | Combined toxicity of zinc oxide nanoparticles and cadmium inducing root damage in <i>Phytolacca americana</i> L.                                                            | Article |  | Sci. Total Environ.             | 2022 | 10.1016/j.scitotenv.2021.151211          |
| 175 | J | Wu, Jingjing; Wang, Ting                                                                                                                                                                      | Synergistic effect of zinc oxide nanoparticles and heat stress on the alleviation of transcriptional gene silencing in <i>Arabidopsis thaliana</i>                          | Article |  | Bull. Environ. Contam. Toxicol. | 2020 | 10.1007/s00128-019-02749-0               |
| 176 | J | Medina-Velo, Illya A.; Barrios, Ana C.; Zuverza-Mena, Nubia; Hernandez-Viezcas, Jose A.; Chang, Chong Hyun; Ji, Zhaoxia; Zink, Jeffrey I.; Peralta-Videa, Jose R.; Gardea-Torresdey, Jorge L. | Comparison of the effects of commercial coated and uncoated ZnO nanomaterials and Zn compounds in kidney bean ( <i>Phaseolus vulgaris</i> ) plants                          | Article |  | J. Hazard. Mater.               | 2017 | 10.1016/j.jhazmat.2017.03.008            |

|     |   |                                                                                                                                                            |                                                                                                                                                                                          |         |  |                                               |      |                                 |
|-----|---|------------------------------------------------------------------------------------------------------------------------------------------------------------|------------------------------------------------------------------------------------------------------------------------------------------------------------------------------------------|---------|--|-----------------------------------------------|------|---------------------------------|
| 177 | J | Garcia-Gomez, Concepcion; Obrador, Ana; Gonzalez, Demetrio; Babin, Mar; Dolores Fernandez, Maria                                                           | Comparative study of the phytotoxicity of ZnO nanoparticles and Zn accumulation in nine crops grown in a calcareous soil and an acidic soil                                              | Article |  | Sci. Total Environ.                           | 2018 | 10.1016/j.scitotenv.2018.06.356 |
| 178 | J | Tanveer, Yashfa; Yasmin, Humaira; Nosheen, Asia; Ali, Sajad; Ahmad, Ajaz                                                                                   | Ameliorative effects of plant growth promoting bacteria, zinc oxide nanoparticles and oxalic acid on <i>Luffa acutangula</i> grown on arsenic enriched soil                              | Article |  | Environ. Pollut.                              | 2022 | 10.1016/j.envpol.2022.118889    |
| 179 | J | Siani, Narges Ghasemi; Fallah, Seyfollah; Pokhrel, Lok Raj; Rostamnejadi, Ali                                                                              | Natural amelioration of zinc oxide nanoparticle toxicity in fenugreek ( <i>Trigonella foenum-gracum</i> ) by arbuscular mycorrhizal ( <i>Glomus intraradices</i> ) secretion of glomalin | Article |  | Plant Physiol. Biochem.                       | 2017 | 10.1016/j.plaphy.2017.01.001    |
| 180 | J | Malandrakis, Anastasios A.; Kavroulakis, Nektarios; Avramidou, Marianna; Papadopoulou, Kalliope K.; Tsaniklidis, Georgios; Chrysikopoulos, Constantinos, V | Metal nanoparticles: Phytotoxicity on tomato and effect on symbiosis with the <i>Fusarium solani</i> FsK strain                                                                          | Article |  | Sci. Total Environ.                           | 2021 | 10.1016/j.scitotenv.2021.147606 |
| 181 | J | Ebbs, Stephen D.; Bradfield, Scott J.; Kumar, Pawan; White, Jason C.; Ma, Xingmao                                                                          | Projected dietary intake of zinc, copper, and cerium from consumption of carrot ( <i>Daucus carota</i> ) exposed to metal oxide nanoparticles or metal ions                              | Article |  | Front. Plant Sci.                             | 2016 | 10.3389/fpls.2016.00188         |
| 182 | J | Ghosh, Manosij; Jana, Aditi; Sinha, Sonali; Jothiramajayam, Manivannan; Nag, Anish; Chakraborty, Anirban; Mukherjee, Amitava; Mukherjee, Anita             | Effects of ZnO nanoparticles in plants: Cytotoxicity, genotoxicity, deregulation of antioxidant defenses, and cell-cycle arrest                                                          | Article |  | Mutat. Res. Genet. Toxicol. Environ. Mutagen. | 2016 | 10.1016/j.mrgentox.2016.07.006  |
| 183 | J | Li, Yuzhan; Liang, Luxin; Li, Wu; Ashraf, Umair; Ma, Lin; Tang, Xiangru; Pan, Shenggang; Tian, Hua; Mo, Zhaowen                                            | ZnO nanoparticle-based seed priming modulates early growth and enhances physio-biochemical and metabolic profiles of fragrant rice against cadmium toxicity                              | Article |  | J. Nanobiotechnol.                            | 2021 | 10.1186/s12951-021-00820-9      |
| 184 | J | Zafar, Hira; Ali, Attarad; Ali, Joham S.; Haq, Ihsan U.; Zia, Muhammad                                                                                     | Effect of ZnO nanoparticles on <i>Brassica nigra</i> seedlings and stem explants: Growth dynamics and antioxidative response                                                             | Article |  | Front. Plant Sci.                             | 2016 | 10.3389/fpls.2016.00535         |



|     |   |                                                                                                                                                                                                 |                                                                                                                                                                                                        |         |  |                        |      |                              |
|-----|---|-------------------------------------------------------------------------------------------------------------------------------------------------------------------------------------------------|--------------------------------------------------------------------------------------------------------------------------------------------------------------------------------------------------------|---------|--|------------------------|------|------------------------------|
| 185 | J | Rizwan, Muhammad; Ali, Shafaqat; Rehman, Muhammad Zia Ur; Adrees, Muhammad; Arshad, Muhammad; Qayyum, Muhammad Farooq; Ali, Liaqat; Hussain, Afzal; Chatha, Shahzad Ali Shahid; Imran, Muhammad | Alleviation of cadmium accumulation in maize ( <i>Zea mays</i> L.) by foliar spray of zinc oxide nanoparticles and biochar to contaminated soil                                                        | Article |  | Environ. Pollut.       | 2019 | 10.1016/j.envpol.2019.02.031 |
| 186 | J | Adrees, Muhammad; Khan, Zahra Saeed; Hafeez, Muhammad; Rizwan, Muhammad; Hussain, Khalid; Asrar, Muhammad; Alyemni, Mohammed Nasser; Wijaya, Leonard; Ali, Shafaqat                             | Foliar exposure of zinc oxide nanoparticles improved the growth of wheat ( <i>Triticum aestivum</i> L.) and decreased cadmium concentration in grains under simultaneous Cd and water deficient stress | Article |  | Ecotox. Environ. Safe. | 2021 | 10.1016/j.ecoenv.2020.111627 |
| 187 | J | Laura Lopez-Moreno, Martha; de la Rosa, Guadalupe; Cruz-Jimenez, Gustavo; Castellano, Laura; Peralta-Videa, Jose R.; Gardea-Torresdey, Jorge L.                                                 | Effect of ZnO nanoparticles on corn seedlings at different temperatures; X-ray absorption spectroscopy and ICP/OES studies                                                                             | Article |  | Microchem J.           | 2017 | 10.1016/j.microc.2017.05.007 |
| 188 | J | Komatsu, Setsuko; Murata, Kazuki; Yakeishi, Sayuri; Shimada, Kazuyuki; Yamaguchi, Hisateru; Hitachi, Keisuke; Tsuchida, Kunihiro; Obi, Rumina; Akita, Shoichi; Fukuda, Ryo                      | Morphological and proteomic analyses of soybean seedling interaction mechanism affected by fiber crosslinked with zinc-oxide nanoparticles                                                             | Article |  | Int. J. Mol. Sci.      | 2022 | 10.3390/ijms23137415         |
| 189 | J | da Cruz, Tatiana N. M.; Savassa, Susilaine M.; Montanha, Gabriel S.; Ishida, Juliane K.; de Almeida, Eduardo; Tsai, Siu M.; Lavres Junior, Jose; Pereira de Carvalho, Hudson W.                 | A new glance on root-to-shoot in vivo zinc transport and time-dependent physiological effects of ZnSO <sub>4</sub> and ZnO nanoparticles on plants                                                     | Article |  | Sci Rep                | 2019 | 10.1038/s41598-019-46796-3   |
| 190 | J | Hussain, Afzal; Ali, Shafaqat; Rizwan, Muhammad; Rehman, Muhammad Zia ur; Javed,                                                                                                                | Zinc oxide nanoparticles alter the wheat physiological response and reduce the cadmium uptake by plants                                                                                                | Article |  | Environ. Pollut.       | 2018 | 10.1016/j.envpol.2018.08.036 |

|     |   |                                                                                                                                                                   |                                                                                                                                                              |         |  |                                    |                                           |
|-----|---|-------------------------------------------------------------------------------------------------------------------------------------------------------------------|--------------------------------------------------------------------------------------------------------------------------------------------------------------|---------|--|------------------------------------|-------------------------------------------|
|     |   | Muhammad Rizwan; Imran, Muhammad; Chatha, Shahzad Ali Shahid; Nazir, Rashid                                                                                       |                                                                                                                                                              |         |  |                                    |                                           |
| 191 | J | Sun, Liangliang; Wang, Ruting; Ju, Qiong; Xing, Menglu; Li, Ruishan; Li, Weimin; Li, Wen; Wang, Wenying; Deng, Yanfang; Xu, Jin                                   | Mitigation mechanism of zinc oxide nanoparticles on cadmium toxicity in tomato                                                                               | Article |  | Front. Plant Sci.                  | 2023<br>10.3389/fpls.2023.1162372         |
| 192 | J | Savassa, Susilaine M.; Duran, Nadia M.; Rodrigues, Eduardo S.; de Almeida, Eduardo; van Gestel, Cornelis A. M.; Bompadre, Thiago F. V.; de Carvalho, Hudson W. P. | Effects of ZnO nanoparticles on <i>Phaseolus vulgaris</i> germination and seedling development determined by X-ray spectroscopy                              | Article |  | ACS Appl. Nano Mater.              | 2018<br>10.1021/acsanm.8b01619            |
| 193 | J | Mahfooz, Sadaf; Jahan, Sadaf; Shamim, Adeeba; Husain, Arbab; Farooqui, Alvina                                                                                     | Oxidative stress and response of antioxidant system in <i>Nostoc muscorum</i> exposed to different forms of zinc                                             | Article |  | Turk. J. Biochem.                  | 2018<br>10.1515/tjb-2017-0236             |
| 194 | J | Mahawar, Himanshu; Prasanna, Radha; Simranjit, Kaur; Thapa, Shobit; Kanchan, Amrita; Singh, Rajendra; Kaushik, Suresh Chand; Singh, Surender; Nain, Lata          | Deciphering the mode of interactions of nanoparticles with mung bean ( <i>Vigna radiata</i> L.)                                                              | Article |  | Isr. J. Plant Sci.                 | 2018<br>10.1080/07929978.2017.1288516     |
| 195 | J | Szymanski, Marcin; Dobrucka, Renata                                                                                                                               | Application of phytotests to study of environmental safety of biologically synthesised Au and Au/ZnO nanoparticles using <i>Tanacetum parthenium</i> extract | Article |  | J. Inorg. Organomet. Polym. Mater. | 2022<br>10.1007/s10904-021-02188-7        |
| 196 | J | Josko, Izabela; Oleszczuk, Patryk                                                                                                                                 | Influence of soil type and environmental conditions on ZnO, TiO <sub>2</sub> and Ni nanoparticles phytotoxicity                                              | Article |  | Chemosphere                        | 2013<br>10.1016/j.chemosphere.2013.02.048 |
| 197 | J | Rani, Simran; Kumar, Pradeep; Dahiya, Priyanka; Dang, Amita Suneja; Suneja, Pooja                                                                                 | Biogenic synthesis of zinc nanoparticles, their applications, and toxicity prospects                                                                         | Review  |  | Front. Microbiol.                  | 2022<br>10.3389/fmicb.2022.824427         |
| 198 | J | Prakash, Ved; Rai, Padmaja; Sharma, Nilesh C.; Singh,                                                                                                             | Application of zinc oxide nanoparticles as fertilizer boosts growth in rice plant                                                                            | Article |  | Chemosphere                        | 2022<br>10.1016/j.chemosphere.2022.134554 |

|     |   |                                                                                                                                                                        |                                                                                                                                                                                                               |                            |                                                                                                   |                            |      |                                    |
|-----|---|------------------------------------------------------------------------------------------------------------------------------------------------------------------------|---------------------------------------------------------------------------------------------------------------------------------------------------------------------------------------------------------------|----------------------------|---------------------------------------------------------------------------------------------------|----------------------------|------|------------------------------------|
|     |   | Vijay Pratap; Tripathi, Durgesh Kumar; Sharma, Shivesh; Sahi, Shivendra                                                                                                | and alleviates chromium stress by regulating genes involved in oxidative stress                                                                                                                               |                            |                                                                                                   |                            |      |                                    |
| 199 | J | Janani, B.; Raju, Lija L.; Thomas, Ajith M.; Alyemni, Mohammed Nasser; Dudin, Gani Asa; Wijaya, Leonard; Alsahli, Abdulaziz Abdullah; Ahmad, Parvaiz; Khan, S. Sudheer | Impact of bovine serum albumin - A protein corona on toxicity of ZnO NPs in environmental model systems of plant, bacteria, algae and crustaceans                                                             | Article                    |                                                                                                   | Chemosphere                | 2021 | 10.1016/j.chemosphere.2020.12.8629 |
| 200 | J | Kalcikova, Gabriela; Marolt, Gregor; Kokalj, Anita Jemec; Gotvajn, Andreja Zgajnar                                                                                     | The use of multiwell culture plates in the duckweed toxicity test-A case study on Zn nanoparticles                                                                                                            | Article; Proceedings Paper | 4th International Conference on Implementation of Microreactor Technology in Biotechnology (IMTB) | New Biotech.               | 2018 | 10.1016/j.nbt.2018.06.002          |
| 201 | J | Zeeshan, Muhammad; Hu, Yu Xin; Iqbal, Anas; Salam, Abdul; Liu, Yong Xin; Muhammad, Ihsan; Ahmad, Shakeel; Khan, Aamir Hamid; Hale, Brett; Wu, Hai Yan; Zhou, Xun Bo    | Amelioration of AsV toxicity by concurrent application of ZnO-NPs and Se-NPs is associated with differential regulation of photosynthetic indexes, antioxidant pool and osmolytes content in soybean seedling | Article                    |                                                                                                   | Ecotox. Environ. Safe.     | 2021 | 10.1016/j.ecoenv.2021.112738       |
| 202 | J | Du, Jingjing; Qv, Wenrui; Niu, Yulong; Yuan, Shuaikang; Zhang, Lingyan; Yang, Huilian; Zhang, Yuyan                                                                    | Co-exposures of acid rain and ZnO nanoparticles accelerate decomposition of aquatic leaf litter                                                                                                               | Article                    |                                                                                                   | J. Hazard. Mater.          | 2022 | 10.1016/j.jhazmat.2021.128141      |
| 203 | J | Xiang, Lei; Zhao, Hai-Ming; Li, Yan-Wen; Huang, Xian-Pei; Wu, Xiao-Lian; Zhai, Teng; Yuan, Yue; Cai, Quan-Ying; Mo, Ce-Hui                                             | Effects of the size and morphology of zinc oxide nanoparticles on the germination of Chinese cabbage seeds                                                                                                    | Article                    |                                                                                                   | Environ. Sci. Pollut. Res. | 2015 | 10.1007/s11356-015-4172-9          |
| 204 | J | Yadav, Ravi Kumar; Singh, N. B.; Singh, Ajey; Yadav, Vijaya; Niharika; Khare, Shubhra; Azim, Zeba                                                                      | Role of bio-based synthesized nanozinc oxide in ameliorating the deleterious effects caused by lead in <i>Vigna radiata</i> L                                                                                 | Article                    |                                                                                                   | Appl. Biochem. Biotechnol. | 2022 | 10.1007/s12010-022-03801-2         |

|     |   |                                                                                                                                                                                   |                                                                                                                                                                                                        |                            |                                                                                                                                               |                                   |      |                                   |
|-----|---|-----------------------------------------------------------------------------------------------------------------------------------------------------------------------------------|--------------------------------------------------------------------------------------------------------------------------------------------------------------------------------------------------------|----------------------------|-----------------------------------------------------------------------------------------------------------------------------------------------|-----------------------------------|------|-----------------------------------|
| 205 | J | Arfaoui, Hiba; Karmous, Ines; Mahjoubi, Yethreb; Kharbech, Oussama; Tlahig, Samir; Loumerem, Mohammed; Chaoui, Abdelilah                                                          | Screening of the effects of zinc oxide based nanofertilizers on the germination of <i>Lathyrus sativa</i> L. seeds                                                                                     | Article                    |                                                                                                                                               | J. Appl. Bot. Food Qual.          | 2021 | 10.5073/JABFQ.2021.094.007        |
| 206 | J | Khan, Muhammad Ali; Yasmin, Humaira; Shah, Zafar Abbas; Rinklebe, Joerg; Alyemeni, Mohammed Nasser; Ahmad, Parvaiz                                                                | Co application of biofertilizer and zinc oxide nanoparticles upregulate protective mechanism culminating improved arsenic resistance in maize                                                          | Article                    |                                                                                                                                               | Chemosphere                       | 2022 | 10.1016/j.chemosphere.2022.133796 |
| 207 | J | Anderson, Anne J.; McLean, Joan E.; Jacobson, Astrid R.; Britt, David W.                                                                                                          | CuO and ZnO nanoparticles modify interkingdom cell signaling processes relevant to crop production                                                                                                     | Article; Proceedings Paper | 1st International Conference on Nanotechnology Applications and Implications of Agrochemicals toward Sustainable Agriculture and Food Systems | J. Agric. Food Chem.              | 2018 | 10.1021/acs.jafc.7b01302          |
| 208 | J | Saeed, Faryal; Younas, Muhammad; Fazal, Hina; Mushtaq, Sadaf; Rahman, Faiz Ur; Shah, Muzamil; Anjum, Sumaira; Ahmad, Nisar; Ali, Mohammad; Hano, Christophe; Abbasi, Bilal Haider | Green and chemically synthesized zinc oxide nanoparticles: Effects on in-vitro seedlings and callus cultures of <i>Silybum marianum</i> and evaluation of their antimicrobial and anticancer potential | Article                    |                                                                                                                                               | Artif. Cell. Nanomed. Biotechnol. | 2021 | 10.1080/21691401.2021.1926274     |
| 209 | J | Martins, Natercia C. T.; Avellan, Astrid; Rodrigues, Sandra; Salvador, Diana; Rodrigues, Sonia M.; Trindade, Tito                                                                 | Composites of biopolymers and ZnO NPs for controlled release of zinc in agricultural soils and timed delivery for maize                                                                                | Article                    |                                                                                                                                               | ACS Appl. Nano Mater.             | 2020 | 10.1021/acsanm.9b01492            |
| 210 | J | Elshoky, Hisham A.; Yotsova, Ekaterina;                                                                                                                                           | Impact of foliar spray of zinc oxide nanoparticles on the photosynthesis of                                                                                                                            | Article                    |                                                                                                                                               | Plant Physiol. Biochem.           | 2021 | 10.1016/j.plaphy.2021.08.039      |

|     |   |                                                                                                                                                                                                                           |                                                                                                                                                                                                   |         |  |                               |      |                                 |
|-----|---|---------------------------------------------------------------------------------------------------------------------------------------------------------------------------------------------------------------------------|---------------------------------------------------------------------------------------------------------------------------------------------------------------------------------------------------|---------|--|-------------------------------|------|---------------------------------|
|     |   | Farghali, Mohamed A.; Farroh, Khaled Y.; El-Sayed, Kh; Elzorkany, Heba Elsayed; Rashkov, George; Dobrikova, Anelia; Borisova, Preslava; Stefanov, Martin; Ali, Maha Anwar; Apostolova, Emilia                             | <i>Pisum sativum</i> L. under salt stress                                                                                                                                                         |         |  |                               |      |                                 |
| 211 | J | Wei, Xuemin; Cao, Pei; Wang, Gang; Liu, Yang; Song, Jingyuan; Han, Jianping                                                                                                                                               | CuO, ZnO, and gamma-Fe <sub>2</sub> O <sub>3</sub> nanoparticles modified the underground biomass and rhizosphere microbial community of <i>Salvia miltiorrhiza</i> (Bge.) after 165-day exposure | Article |  | Ecotox. Environ. Safe.        | 2021 | 10.1016/j.ecoenv.2021.112232    |
| 212 | J | Sun, Shiqing; Li, Xiuling; Sun, Chen; Cao, Weixing; Hu, Changwei; Zhao, Yongjun; Yang, Aoao                                                                                                                               | Effects of ZnO nanoparticles on the toxicity of cadmium to duckweed <i>Lemna minor</i>                                                                                                            | Article |  | Sci. Total Environ.           | 2019 | 10.1016/j.scitotenv.2019.01.275 |
| 213 | J | Afzal, Shadma; Aftab, Tariq; Singh, Nand K.                                                                                                                                                                               | Impact of zinc oxide and iron oxide nanoparticles on uptake, translocation, and physiological effects in <i>Oryza sativa</i> L.                                                                   | Article |  | J. Plant Growth Regul.        | 2022 | 10.1007/s00344-021-10388-1      |
| 214 | J | Nalci, Ozge Balpınar; Nadaroglu, Hayrunnisa; Pour, Arash Hossein; Gungor, Azize Alayli; Haliloglu, Kamil                                                                                                                  | Effects of ZnO, CuO and -Fe <sub>3</sub> O <sub>4</sub> nanoparticles on mature embryo culture of wheat ( <i>Triticum aestivum</i> L.)                                                            | Article |  | Plant Cell Tissue Organ Cult. | 2019 | 10.1007/s11240-018-1512-8       |
| 215 | J | Hussain, Afzal; Rizwan, Muhammad; Ali, Shafaqat; Rehman, Muhammad Zia ur; Qayyum, Muhammad Farooq; Nawaz, Rab; Ahmad, Awais; Asrar, Muhammad; Ahmad, Sajid Rashid; Alsahli, Abdulaziz Abdullah; Alyemini, Mohammed Nasser | Combined use of different nanoparticles effectively decreased cadmium (Cd) concentration in grains of wheat grown in a field contaminated with Cd                                                 | Article |  | Ecotox. Environ. Safe.        | 2021 | 10.1016/j.ecoenv.2021.112139    |
| 216 | J | Nair, Prakash M. Gopalakrishnan; Chung, Ill Min                                                                                                                                                                           | Regulation of morphological, molecular and nutrient status in <i>Arabidopsis thaliana</i> seedlings in response to ZnO nanoparticles and Zn ion exposure                                          | Article |  | Sci. Total Environ.           | 2017 | 10.1016/j.scitotenv.2016.10.017 |
| 217 | J | Stewart, Jacob; Hansen, Trevor; McLean, Joan E.;                                                                                                                                                                          | Salts affect the interaction of ZnO or CuO nanoparticles with wheat                                                                                                                               | Article |  | Environ. Toxicol. Chem.       | 2015 | 10.1002/etc.3037                |

|     |   |                                                                                                                                                                                                 |                                                                                                                                                                                                                     |         |  |                         |      |                               |
|-----|---|-------------------------------------------------------------------------------------------------------------------------------------------------------------------------------------------------|---------------------------------------------------------------------------------------------------------------------------------------------------------------------------------------------------------------------|---------|--|-------------------------|------|-------------------------------|
|     |   | McManus, Paul; Das, Siddhartha; Britt, David W.; Anderson, Anne J.; Dimkpa, Christian O.                                                                                                        |                                                                                                                                                                                                                     |         |  |                         |      |                               |
| 218 | J | Das, Debadrito; Datta, Animesh Kumar; Kumbhakar, Divya Vishambhar; Ghosh, Bapi; Pramanik, Ankita; Gupta, Sudha; Mandal, Aninda                                                                  | Assessment of photocatalytic potentiality and determination of ecotoxicity (using plant model for better environmental applicability) of synthesized copper, copper oxide and copper-doped zinc oxide nanoparticles | Article |  | PLoS One                | 2017 | 10.1371/journal.pone.0182823  |
| 219 | J | Ahmed, Bilal; Rizvi, Asfa; Syed, Asad; Elgorban, Abdallah M.; Khan, Mohammad Saghir; AL-Shwaiman, Hind A.; Musarrat, Javed; Lee, Jintae                                                         | Differential responses of maize ( <i>Zea mays</i> ) at the physiological, biomolecular, and nutrient levels when cultivated in the presence of nano or bulk ZnO or CuO or Zn <sup>2+</sup> or Cu <sup>2+</sup> ions | Article |  | J. Hazard. Mater.       | 2021 | 10.1016/j.jhazmat.2021.126493 |
| 220 | J | Dobrucka, Renata; Szymanski, Marcin; Przekop, Robert                                                                                                                                            | Phytotoxic effects of biosynthesized ZnO nanoparticles using <i>Betonica officinalis</i> extract                                                                                                                    | Article |  | Environ. Technol.       | 2021 | 10.1080/09593330.2020.1740331 |
| 221 | J | Adele, Nyekachi C.; Ngwenya, Bryne T.; Heal, Kate V.; Mosselmans, J. Frederick W.                                                                                                               | Soil bacteria override speciation effects on zinc phytotoxicity in zinc-contaminated soils                                                                                                                          | Article |  | Environ. Sci. Technol.  | 2018 | 10.1021/acs.est.7b05094       |
| 222 | J | El-Badri, Ali M. A.; Batool, Maria; Mohamed, Ibrahim A. A.; Khatab, Ahmed; Sherif, Ahmed; Wang, Zongkai; Salah, Akram; Nishawy, Elsayed; Ayaad, Mohammed; Kuai, Jie; Wang, Bo; Zhou, Guangsheng | Modulation of salinity impact on early seedling stage via nano-priming application of zinc oxide on rapeseed ( <i>Brassica napus</i> L.)                                                                            | Article |  | Plant Physiol. Biochem. | 2021 | 10.1016/j.plaphy.2021.05.040  |
| 223 | J | Wan, Jinpeng; Wang, Ruting; Wang, Ruling; Ju, Qiong; Wang, Yibo; Xu, Jin                                                                                                                        | Comparative physiological and transcriptomic analyses reveal the toxic effects of ZnO nanoparticles on plant growth                                                                                                 | Article |  | Environ. Sci. Technol.  | 2019 | 10.1021/acs.est.8b06641       |
| 224 | J | Jahantab, Esfandiar; Farzadmehr, Jalil; Matinkhah, SayedHamid; Abadi, Nikoo Taheri Mohammad; Shafeiyan, Elham; Yazdanshenas,                                                                    | Effect of metal oxide nanoparticles on the activity of glutathione reductase, catalase, peroxidase and superoxide dismutase in plants under drought                                                                 | Article |  | Irrig. Drain.           | 2022 | 10.1002/ird.2739              |

|     |   |                                                                                                                                                                                                                                    |                                                                                                                                             |         |  |                              |      |                                 |
|-----|---|------------------------------------------------------------------------------------------------------------------------------------------------------------------------------------------------------------------------------------|---------------------------------------------------------------------------------------------------------------------------------------------|---------|--|------------------------------|------|---------------------------------|
|     |   | Habib                                                                                                                                                                                                                              |                                                                                                                                             |         |  |                              |      |                                 |
| 225 | J | Reddy, P. Venkata Laxma; Hernandez-Viezcas, J. A.; Peralta-Videa, J. R.; Gardea-Torresdey, J. L.                                                                                                                                   | Lessons learned: Are engineered nanomaterials toxic to terrestrial plants?                                                                  | Review  |  | Sci. Total Environ.          | 2016 | 10.1016/j.scitotenv.2016.06.042 |
| 226 | J | Troppova, Ivana; Matejova, Lenka; Sezimova, Hana; Matej, Zdenek; Peikertova, Pavlina; Lang, Jaroslav                                                                                                                               | Nanostructured TiO <sub>2</sub> and ZnO prepared by using pressurized hot water and their eco-toxicological evaluation                      | Article |  | J. Nanopart. Res.            | 2017 | 10.1007/s11051-017-3877-8       |
| 227 | J | Boddupalli, Anuraag; Tiwari, Rameshwar; Sharma, Anamika; Singh, Surender; Prasanna, Radha; Nain, Lata                                                                                                                              | Elucidating the interactions and phytotoxicity of zinc oxide nanoparticles with agriculturally beneficial bacteria and selected crop plants | Article |  | Folia Microbiol.             | 2017 | 10.1007/s12223-017-0495-x       |
| 228 | J | Czyzowska, Agnieszka; Barbasz, Anna                                                                                                                                                                                                | A review: Zinc oxide nanoparticles - friends or enemies?                                                                                    | Review  |  | Int. J. Environ. Health Res. | 2022 | 10.1080/09603123.2020.1805415   |
| 229 | J | Asztemborska, Monika; Bembenek, Marcin; Jakubiak, Malgorzata; Steborowski, Romuald; Bystrzejewska-Piotrowska, Grazyna                                                                                                              | The effect of nanoparticles with sorption capacity on the bioaccumulation of divalent ions by aquatic plants                                | Article |  | Int. J. Environ. Res.        | 2018 | 10.1007/s41742-018-0087-x       |
| 230 | J | Dogaroglu, Zeynep G.                                                                                                                                                                                                               | Role of EDDS and ZnO-nanoparticles in wheat exposed to TiO <sub>2</sub> Ag-nanoparticles                                                    | Article |  | Arch. Environ. Prot.         | 2019 | 10.24425/aep.2019.130244        |
| 231 | J | Emamverdian, Abolghassem; Ding, Yulong; Hasanuzzaman, Mirza; Barker, James; Liu, Guohua; Li, Yang; Mokhberdoran, Farzad                                                                                                            | Insight into the biochemical and physiological mechanisms of nanoparticles-induced arsenic tolerance in bamboo                              | Article |  | Front. Plant Sci.            | 2023 | 10.3389/fpls.2023.1121886       |
| 232 | J | Anik, Touhidur Rahman; Mostofa, Mohammad Golam; Rahman, Mezanur; Khan, Arifur Rahman; Ghosh, Protik Kumar; Sultana, Sharmin; Das, Ashim Kumar; Hossain, Saddam; Keya, Sanjida Sultana; Rahman, Abiar; Jahan, Nusrat; Gupta, Aarti; | Zn supplementation mitigates drought effects on cotton by improving photosynthetic performance and antioxidant defense mechanisms           | Article |  | Antioxidants                 | 2023 | 10.3390/antiox12040854          |

|     |   |                                                                                                                                                                                                                                    |                                                                                                                                                                                              |         |  |                        |      |                              |
|-----|---|------------------------------------------------------------------------------------------------------------------------------------------------------------------------------------------------------------------------------------|----------------------------------------------------------------------------------------------------------------------------------------------------------------------------------------------|---------|--|------------------------|------|------------------------------|
|     |   | Tran, Lam-Son Phan                                                                                                                                                                                                                 |                                                                                                                                                                                              |         |  |                        |      |                              |
| 233 | J | Singh, Priyanka; Arif, Yamshi; Siddiqui, Husna; Sami, Fareen; Zaidi, Rumman; Azam, Ameer; Alam, Pravej; Hayat, Shamsul                                                                                                             | Nanoparticles enhances the salinity toxicity tolerance in <i>Linum usitatissimum</i> L. by modulating the antioxidative enzymes, photosynthetic efficiency, redox status and cellular damage | Article |  | Ecotox. Environ. Safe. | 2021 | 10.1016/j.ecoenv.2021.112020 |
| 234 | J | Garcia-Lopez, Josue I.; Zavala-Garcia, Francisco; Olivares-Saenz, Emilio; Lira-Saldivar, Ricardo H.; Diaz Barriga-Castro, Enrique; Ruiz-Torres, Norma A.; Ramos-Cortez, Edith; Vazquez-Alvarado, Rigoberto; Nino-Medina, Guillermo | Zinc oxide nanoparticles boosts phenolic compounds and antioxidant activity of <i>Capsicum annuum</i> L. during germination                                                                  | Article |  | Agronomy-Basel         | 2018 | 10.3390/agronomy8100215      |
| 235 | J | Khan, Ali Raza; Azhar, Wardah; Wu, Junyu; Ulhassan, Zaid; Salam, Abdul; Zaidi, Syed Hassan Raza; Yang, Shuaiqi; Song, Ge; Gan, Yinbo                                                                                               | Ethylene participates in zinc oxide nanoparticles induced biochemical, molecular and ultrastructural changes in rice seedlings                                                               | Article |  | Ecotox. Environ. Safe. | 2021 | 10.1016/j.ecoenv.2021.112844 |
| 236 | J | Shome, Soumitra; Tewari, Sujit; Bhattacharya, Mrinal Kanti; Panda, Sanjib Kumar; Upadhyaya, Hrishikesh                                                                                                                             | Phytofunctionalized ZnO nanoparticles ameliorate water stress and its recovery in <i>Oryza sativa</i> L.                                                                                     | Article |  | Acta Physiol. Plant.   | 2022 | 10.1007/s11738-022-03477-5   |
| 237 | J | Baskar, Venkidasamy; Nayeem, Safia; Kuppuraj, Sree Preethy; Muthu, Thiruvengadam; Ramalingam, Sathishkumar                                                                                                                         | Assessment of the effects of metal oxide nanoparticles on the growth, physiology and metabolic responses in in vitro grown eggplant ( <i>Solanum melongena</i> )                             | Article |  | 3 Biotech              | 2018 | 10.1007/s13205-018-1386-9    |
| 238 | J | Ahmed, Bilal; Dwivedi, Sourabh; Abdin, Malik Zainul; Azam, Ameer; Al-Shaeri, Majed; Khan, Mohammad Saghir; Saquib, Quaiser; Al-Khedhairi, Abdulaziz A.; Musarrat, Javed                                                            | Mitochondrial and chromosomal damage induced by oxidative stress in Zn <sup>2+</sup> ions, ZnO-bulk and ZnO-NPs treated <i>Allium cepa</i> roots                                             | Article |  | Sci Rep                | 2017 | 10.1038/srep40685            |
| 239 | J | Sorahinobar, Mona; Deldari,                                                                                                                                                                                                        | Effect of zinc nanoparticles on the                                                                                                                                                          | Article |  | Biologia               | 2023 | 10.1007/s11756-022-01269-3   |



|     |   |                                                                                                                                   |                                                                                                                                                                                                                                                                  |         |  |                                 |      |                                          |
|-----|---|-----------------------------------------------------------------------------------------------------------------------------------|------------------------------------------------------------------------------------------------------------------------------------------------------------------------------------------------------------------------------------------------------------------|---------|--|---------------------------------|------|------------------------------------------|
|     |   | Tooba; Nazem Bokaei, Zahra; Mehdinia, Ali                                                                                         | growth and biofortification capability of mungbean ( <i>Vigna radiata</i> ) seedlings                                                                                                                                                                            |         |  |                                 |      |                                          |
| 240 | J | Ghoto, Kabir; Shen, Zhi-Jun; Simon, Martin; Gao, Gui-Feng; Wei, Ming-Yue; Zheng, Hai-Lei                                          | Maize seedling root exudation, growth and physiological alterations induced by the toxicity of zinc oxide nanoparticles                                                                                                                                          | Article |  | Pak. J. Agric. Sci.             | 2022 | 10.21162/PAKJAS/22.1063                  |
| 241 | J | Azhar, Beenish J.; Noor, Asma; Zulfiqar, Alveena; Zeenat, Asyia; Ahmad, Shakeel; Chishti, Iqbal; Abbas, Zehra; Shakeel, Samina N. | Effect of ZnO, SiO <sub>2</sub> and composite nanoparticles on <i>Arabidopsis thaliana</i> and involvement of ethylene and cytokinin signaling pathways                                                                                                          | Article |  | Pak. J. Bot.                    | 2021 | 10.30848/PJB2021-2(40)                   |
| 242 | J | Pereira, Flavia F.; Paris, Elaine C.; Bresolin, Joana D.; Mitsuyuki, Milene C.; Ferreira, Marcos D.; Correa, Daniel S.            | The effect of ZnO nanoparticles morphology on the toxicity towards microalgae <i>Pseudokirchneriella subcapitata</i>                                                                                                                                             | Article |  | J. Nanosci. Nanotechnol.        | 2020 | 10.1166/jnn.2020.16880                   |
| 243 | J | Aravantinou, Andriana F.; Andreou, Fytoula; Manariotis, Ioannis D.                                                                | Long-term toxicity of ZnO nanoparticles to <i>Scenedesmus rubescens</i> cultivated in different media                                                                                                                                                            | Article |  | Sci Rep                         | 2017 | 10.1038/s41598-017-13517-7               |
| 244 | J | Chemingui, Hajer; Smiri, Moez; Missaoui, Takwa; Hafiane, Amor                                                                     | Zinc oxide nanoparticles induced oxidative stress and changes in the photosynthetic apparatus in fenugreek ( <i>Trigonella foenum graecum</i> L.)                                                                                                                | Article |  | Bull. Environ. Contam. Toxicol. | 2019 | 10.1007/s00128-019-02590-5               |
| 245 | J | Fazelian, Nasrin; Yousefzadi, Morteza; Movafeghi, Ali                                                                             | Algal response to metal oxide nanoparticles: Analysis of growth, protein content, and fatty acid composition                                                                                                                                                     | Article |  | BioEnergy Res.                  | 2020 | 10.1007/s12155-020-10099-7               |
| 246 | J | Cheng, Yongchao; Cheng, Yuxuan; Zheng, Han; Song, Yaxin; Li, Ruizhe; Wan, Fengting; Li, Junli                                     | Evaluation and comparison of the toxic effects of MgO NPs, ZnO NPs, alpha-Fe <sub>2</sub> O <sub>3</sub> NPs, gamma-Fe <sub>2</sub> O <sub>3</sub> NPs, and Fe <sub>3</sub> O <sub>4</sub> NPs on the remediation for cadmium-related effects in wheat seedlings | Article |  | Water Air Soil Pollut.          | 2020 | 10.1007/s11270-020-04834-1               |
| 247 | J | Javed, Rabia; Usman, Muhammad; Yucesan, Buhara; Zia, Muhammad; Gurel, Ekrem                                                       | Effect of zinc oxide (ZnO) nanoparticles on physiology and steviol glycosides production in micropropagated shoots of <i>Stevia rebaudiana</i> Bertoni                                                                                                           | Article |  | Plant Physiol. Biochem.         | 2017 | 10.1016/j.plaphy.2016.05.032             |
| 248 | J | Qiao Jin; Xu Chang-shan; Zhang Hai-jiao; Shao Hai-ling; Zheng Bo-wen; He Hui-min                                                  | Effects of ZnO NPs on the photosynthetic processes of <i>Egeria najas</i>                                                                                                                                                                                        | Article |  | Spectrosc. Spectr. Anal.        | 2019 | 10.3964/j.issn.1000-0593(2019)05-1495-08 |

|     |   |                                                                                                                                                                                                |                                                                                                                                                                                         |                   |                                                                    |                               |      |                               |
|-----|---|------------------------------------------------------------------------------------------------------------------------------------------------------------------------------------------------|-----------------------------------------------------------------------------------------------------------------------------------------------------------------------------------------|-------------------|--------------------------------------------------------------------|-------------------------------|------|-------------------------------|
| 249 | J | Noohpisheh, Zahra; Amiri, Hamzeh; Mohammadi, Abdolnaser; Farhadi, Saeed                                                                                                                        | Effect of the foliar application of zinc oxide nanoparticles on some biochemical and physiological parameters of <i>Trigonella foenum-graecum</i> under salinity stress                 | Article           |                                                                    | Plant Biosyst.                | 2021 | 10.1080/11263504.2020.1739160 |
| 250 | J | Yin, Jianan; Huang, Guohe; An, Chunjiang; Feng, Renfei                                                                                                                                         | Nanocellulose enhances the dispersion and toxicity of ZnO NPs to green algae <i>Eremosphaera viridis</i>                                                                                | Article           |                                                                    | Environ. Sci.: Nano           | 2022 | 10.1039/d1en00881a            |
| 251 | J | Shah, Ghulam Mustafa; Ali, Hifsa; Ahmad, Iftikhar; Kamran, Muhammad; Hammad, Mohkum; Shah, Ghulam Abbas; Bakhat, Hafiz Faiq; Waqar, Atika; Guo, Jianbin; Dong, Renjie; Rashid, Muhammad Imtiaz | Nano agrochemical zinc oxide influences microbial activity, carbon, and nitrogen cycling of applied manures in the soil-plant system                                                    | Article           |                                                                    | Environ. Pollut.              | 2022 | 10.1016/j.envpol.2021.118559  |
| 252 | J | Singh, Divya; Kumar, Arun                                                                                                                                                                      | Assessment of toxic interaction of nano zinc oxide and nano copper oxide on germination of <i>Raphanus sativus</i> seeds                                                                | Article           |                                                                    | Environ. Monit. Assess.       | 2019 | 10.1007/s10661-019-7902-5     |
| 253 | J | Rahimzadeh, Saeedeh; Ghassemi-Golezani, Kazem                                                                                                                                                  | Biochar-based nutritional nanocomposites altered nutrient uptake and vacuolar H <sup>+</sup> -pump activities of dill under salinity                                                    | Article           |                                                                    | J. Soil Sci. Plant Nutr.      | 2022 | 10.1007/s42729-022-00910-z    |
| 254 | C | Sunita; Tripathy, Suraj Kumar                                                                                                                                                                  | Environmental effect of ZnO and CuOnp's on growth and tissue specific accumulation in <i>Brassica juncea</i>                                                                            | Proceedings Paper | National Conference on Nanotechnology and Renewable Energy (NCNRE) | Adv. Sci. Lett.               | 2014 | 10.1166/asl.2014.5584         |
| 255 | J | Radi, Abeer A.; Farghaly, Fatma A.; Al-Kahtany, Fatma A.; Hamada, Afaf M.                                                                                                                      | Zinc oxide nanoparticles-mediated changes in ultrastructure and macromolecules of pomegranate callus cells                                                                              | Article           |                                                                    | Plant Cell Tissue Organ Cult. | 2018 | 10.1007/s11240-018-1460-3     |
| 256 | J | Josko, Izabela; Oleszczuk, Patryk; Skwarek, Ewa                                                                                                                                                | Toxicity of combined mixtures of nanoparticles to plants                                                                                                                                | Article           |                                                                    | J. Hazard. Mater.             | 2017 | 10.1016/j.jhazmat.2017.02.028 |
| 257 | J | Kong, In Chul; Ko, Kyung-Seok; Koh, Dong-Chan                                                                                                                                                  | Comparisons of the effect of different metal oxide nanoparticles on the root and shoot growth under shaking and non-shaking incubation, different plants, and binary mixture conditions | Article           |                                                                    | Nanomaterials                 | 2021 | 10.3390/nano11071653          |

|     |   |                                                                                                                                                                                                              |                                                                                                                                                                                |         |  |                           |      |                               |
|-----|---|--------------------------------------------------------------------------------------------------------------------------------------------------------------------------------------------------------------|--------------------------------------------------------------------------------------------------------------------------------------------------------------------------------|---------|--|---------------------------|------|-------------------------------|
| 258 | J | Ahmed, Mohamed F.; Ibrahim, Mostafa A.; Mansour, Ahmed S.; Emam, Ahmed N.; Abd El-Razik, Ashraf B.; Tawfik, Eman                                                                                             | Metal-based-oxide nanoparticles assisted the in vitro culture growth of <i>Populus alba</i> as micronutrients: Essential metabolic processes and genetic stability             | Article |  | RSC Adv.                  | 2023 | 10.1039/d2ra05941j            |
| 259 | J | Seleiman, Mahmoud F.; Alotaibi, Majed A.; Alhammad, Bushra Ahmed; Alharbi, Basmah M.; Refay, Yahya; Badawy, Shima A.                                                                                         | Effects of ZnO nanoparticles and biochar of rice straw and cow manure on characteristics of contaminated soil and sunflower productivity, oil quality, and heavy metals uptake | Article |  | Agronomy-Basel            | 2020 | 10.3390/agronomy10060790      |
| 260 | J | Zhu, Jiahui; Wang, Jia; Zhan, Xinhua; Li, Aoze; White, Jason C.; Gardea-Torresdey, Jorge L.; Xing, Baoshan                                                                                                   | Role of charge and size in the translocation and distribution of zinc oxide particles in wheat cells                                                                           | Article |  | ACS Sustain. Chem. Eng.   | 2021 | 10.1021/acssuschemeng.1c04080 |
| 261 | J | Spano, Carmelina; Bottega, Stefania; Bellani, Lorenza; Muccifora, Simonetta; Sorce, Carlo; Ruffini Castiglione, Monica                                                                                       | Effect of zinc priming on salt response of wheat seedlings: Relieving or worsening?                                                                                            | Article |  | Plants-Basel              | 2020 | 10.3390/plants9111514         |
| 262 | J | Dogaroglu, Z. G.; Koleli, N.                                                                                                                                                                                 | Effects of TiO <sub>2</sub> and ZnO nanoparticles on germination and antioxidant system of wheat ( <i>Triticum aestivum</i> L.)                                                | Article |  | Appl. Ecol. Environ. Res. | 2017 | 10.15666/aeer/1503_14991510   |
| 263 | J | Ahmad, Shoaib; Mfarrej, Manar Fawzi Bani; El-Esawi, Mohamed A.; Waseem, Muhammad; Alatawi, Aishah; Nafees, Muhammad; Saleem, Muhammad Hamzah; Rizwan, Muhammad; Yasmeen, Tahira; Anayat, Alia; Ali, Shafaqat | Chromium-resistant <i>Staphylococcus aureus</i> alleviates chromium toxicity by developing synergistic relationships with zinc oxide nanoparticles in wheat                    | Article |  | Ecotox. Environ. Safe.    | 2022 | 10.1016/j.ecoenv.2021.113142  |
| 264 | J | Bashir, Arooj; Rehman, Muhammad Zia Ur; Hussaini, Khalid Mahmud; Adrees, Muhammad; Qayyum, Muhammad Farooq; Sayal, Aziz Ullah; Rizwan, Muhammad; Ali, Shafaqat; Alsahli, Abdulaziz Abdullah; Alyemeni,       | Combined use of zinc nanoparticles and co-composted biochar enhanced wheat growth and decreased Cd concentration in grains under Cd and drought stress: A field study          | Article |  | Environ. Technol. Innov.  | 2021 | 10.1016/j.eti.2021.101518     |

|     |   |                                                                                                                                                   |                                                                                                                                                                              |         |  |                              |      |                               |
|-----|---|---------------------------------------------------------------------------------------------------------------------------------------------------|------------------------------------------------------------------------------------------------------------------------------------------------------------------------------|---------|--|------------------------------|------|-------------------------------|
|     |   | Mohammed Nasser                                                                                                                                   |                                                                                                                                                                              |         |  |                              |      |                               |
| 265 | J | Sturikova, Helena; Krystofova, Olga; Huska, Dalibor; Adam, Vojtech                                                                                | Zinc, zinc nanoparticles and plants                                                                                                                                          | Article |  | J. Hazard. Mater.            | 2018 | 10.1016/j.jhazmat.2018.01.040 |
| 266 | J | Zhu, Jiahui; Li, Jinfeng; Shen, Yu; Liu, Shiqi; Zeng, Nengde; Zhan, Xinhua; White, Jason C.; Gardea-Torresdey, Jorge; Xing, Baoshan               | Mechanism of zinc oxide nanoparticle entry into wheat seedling leaves                                                                                                        | Article |  | Environ. Sci.: Nano          | 2020 | 10.1039/d0en00658k            |
| 267 | J | Song, Yue; Wang, Binqiang; Qiu, Dengying; Xie, Zhenming; Dai, Shang; Li, Chao; Xu, Shouling; Zheng, Yunchao; Li, Shan; Jiang, Meng                | Melatonin enhances metallic oxide nanoparticle stress tolerance in rice via inducing tetrapyrrole biosynthesis and amino acid metabolism                                     | Article |  | Environ. Sci.: Nano          | 2021 | 10.1039/d1en00244a            |
| 268 | J | Salah, Sheteiwy Mohamed; Guan Yajing; Cao Dongdong; Li Jie; Aamir, Nawaz; Hu Qijuan; Hu Weimin; Ning Mingyu; Hu Jin                               | Seed priming with polyethylene glycol regulating the physiological and molecular mechanism in rice ( <i>Oryza sativa</i> L.) under nano-ZnO stress                           | Article |  | Sci Rep                      | 2015 | 10.1038/srep14278             |
| 269 | J | Ghassemi-Golezani, Kazem; Rahimzadeh, Saeedeh                                                                                                     | Biochar-based nutritional nanocomposites: A superior treatment for alleviating salt toxicity and improving physiological performance of dill ( <i>Anethum graveolens</i> )   | Article |  | Environ. Geochem. Health     | 2023 | 10.1007/s10653-022-01397-4    |
| 270 | J | Ko, Kyung-Seok; Kong, In Chul                                                                                                                     | Toxic effects of nanoparticles on bioluminescence activity, seed germination, and gene mutation                                                                              | Article |  | Appl. Microbiol. Biotechnol. | 2014 | 10.1007/s00253-013-5404-x     |
| 271 | J | Akanbi-Gada, Mariam Abiola; Ogunkunle, Clement O.; Vishwakarma, Vinita; Viswanathan, Kanagasabai; Fatoba, Paul O.                                 | Phytotoxicity of nano-zinc oxide to tomato plant ( <i>Solanum lycopersicum</i> L.): Zn uptake, stress enzymes response and influence on non-enzymatic antioxidants in fruits | Article |  | Environ. Technol. Innov.     | 2019 | 10.1016/j.eti.2019.100325     |
| 272 | J | Israel Garcia-Lopez, Josue; Hugo Lira-Saldivar, Ricardo; Zavala-Garcia, Francisco; Olivares-Saenz, Emilio; Nino-Medina, Guillermo; Angelica Ruiz- | Effects of zinc oxide nanoparticles on growth and antioxidant enzymes of <i>Capsicum chinense</i>                                                                            | Article |  | Toxicol Environ. Chem.       | 2018 | 10.1080/02772248.2018.1550781 |

|     |   |                                                                                                                                                               |                                                                                                                                                                     |         |  |                                 |      |                                   |
|-----|---|---------------------------------------------------------------------------------------------------------------------------------------------------------------|---------------------------------------------------------------------------------------------------------------------------------------------------------------------|---------|--|---------------------------------|------|-----------------------------------|
|     |   | Torres, Norma; Mendez-Arguecello, Bulmaro; Diaz-Barriga, Enrique                                                                                              |                                                                                                                                                                     |         |  |                                 |      |                                   |
| 273 | J | Singh, Divya; Kumar, Arun                                                                                                                                     | Impact of irrigation using water containing CuO and ZnO nanoparticles on <i>Spinach oleracea</i> grown in soil media                                                | Article |  | Bull. Environ. Contam. Toxicol. | 2016 | 10.1007/s00128-016-1872-x         |
| 274 | J | Wu, Fan; Fang, Qing; Yan, Shiwei; Pan, Ling; Tang, Xianjin; Ye, Wenling                                                                                       | Effects of zinc oxide nanoparticles on arsenic stress in rice ( <i>Oryza sativa</i> L.): Germination, early growth, and arsenic uptake                              | Article |  | Environ. Sci. Pollut. Res.      | 2020 | 10.1007/s11356-020-08965-0        |
| 275 | J | Esper Neto, Michel; Britt, David W.; Lara, Lorena Moreira; Cartwright, Anthony; dos Santos, Rayssa Fernanda; Inoue, Tadeu Takeyoshi; Batista, Marcelo Augusto | Initial development of corn seedlings after seed priming with nanoscale synthetic zinc oxide                                                                        | Article |  | Agronomy-Basel                  | 2020 | 10.3390/agronomy10020307          |
| 276 | J | Amooaghaie, Rayhaneh; Norouzi, Maryam; Saeri, Mohammad                                                                                                        | Impact of zinc and zinc oxide nanoparticles on the physiological and biochemical processes in tomato and wheat                                                      | Article |  | Botany                          | 2017 | 10.1139/cjb-2016-0194             |
| 277 | J | Rizwan, Muhammad; Ali, Shafaqat; Ali, Basharat; Adrees, Muhammad; Arshad, Muhammad; Hussain, Afzal; Rehman, Muhammad Zia ur; Waris, Aisha Abdul               | Zinc and iron oxide nanoparticles improved the plant growth and reduced the oxidative stress and cadmium concentration in wheat                                     | Article |  | Chemosphere                     | 2019 | 10.1016/j.chemosphere.2018.09.120 |
| 278 | J | Hu, Changwei; Liu, Yimeng; Li, Xiuling; Li, Mei                                                                                                               | Biochemical responses of duckweed ( <i>Spirodela polyrhiza</i> ) to zinc oxide nanoparticles                                                                        | Article |  | Arch. Environ. Contam. Toxicol. | 2013 | 10.1007/s00244-012-9859-z         |
| 279 | J | Ramzan, Musarrat; Naz, Gul; Shah, Anis Ali; Parveen, Misbah; Jamil, Muhammad; Gill, Sidra; Sharif, Hafiz M. Adeel                                             | Synthesis of phytostabilized zinc oxide nanoparticles and their effects on physiological and anti-oxidative responses of <i>Zea mays</i> (L.) under chromium stress | Article |  | Plant Physiol. Biochem.         | 2023 | 10.1016/j.plaphy.2023.01.015      |
| 280 | J | Wang, Ruting; Sun, Liangliang; Zhang, Ping; Wan, Jinpeng; Wang, Yibo; Xu, Jin                                                                                 | Zinc oxide nanoparticles alleviate cadmium stress by modulating plant metabolism and decreasing cadmium accumulation in <i>Perilla frutescens</i>                   | Article |  | Plant Growth Regul.             | 2023 | 10.1007/s10725-022-00938-2        |

|     |   |                                                                                                                                                                                           |                                                                                                                                                                        |         |  |                             |      |                               |
|-----|---|-------------------------------------------------------------------------------------------------------------------------------------------------------------------------------------------|------------------------------------------------------------------------------------------------------------------------------------------------------------------------|---------|--|-----------------------------|------|-------------------------------|
| 281 | J | Vignati, Davide Anselmo Luigi; Lofrano, Giusy; Libralato, Giovanni; Guida, Marco; Siciliano, Antonietta; Carraturo, Federica; Carotenuto, Maurizio                                        | Photocatalytic ZnO-assisted degradation of spiramycin in urban wastewater: Degradation kinetics and toxicity                                                           | Article |  | Water                       | 2021 | 10.3390/w13081051             |
| 282 | J | Shafqat, Usman; Hussain, Sabir; Shahzad, Tanvir; Shahid, Muhammad; Mahmood, Faisal                                                                                                        | Elucidating the phytotoxicity thresholds of various biosynthesized nanoparticles on physical and biochemical attributes of cotton                                      | Article |  | Chem. Biol. Technol. Agric. | 2023 | 10.1186/s40538-023-00402-x    |
| 283 | J | Voloshina, Marina; Rajput, Vishnu D.; Minkina, Tatiana; Vechkanov, Evgeniy; Mandzhieva, Saglara; Mazarji, Mahmoud; Churyukina, Ella; Plotnikov, Andrey; Krepakova, Maria; Wong, Ming Hung | Zinc oxide nanoparticles: Physiological and biochemical responses in barley ( <i>Hordeum vulgare</i> L.)                                                               | Article |  | Plants-Basel                | 2022 | 10.3390/plants11202759        |
| 284 | J | Gottschalk, Fadri; Kost, Elias; Nowack, Bernd                                                                                                                                             | Engineered nanomaterials in water and soils: A risk quantification based on probabilistic exposure and effect modeling                                                 | Article |  | Environ. Toxicol. Chem.     | 2013 | 10.1002/etc.2177              |
| 285 | J | Khan, Zahra Saeed; Rizwan, Muhammad; Hafeez, Muhammad; Ali, Shafaqat; Javed, Muhammad Rizwan; Adrees, Muhammad                                                                            | The accumulation of cadmium in wheat ( <i>Triticum aestivum</i> ) as influenced by zinc oxide nanoparticles and soil moisture conditions                               | Article |  | Environ. Sci. Pollut. Res.  | 2019 | 10.1007/s11356-019-05333-5    |
| 286 | J | Chutipaijit, Sutee                                                                                                                                                                        | Establishment of condition and nanoparticle factors influencing plant regeneration from aromatic rice ( <i>Oryza sativa</i> )                                          | Article |  | Int. J. Agric. Biol.        | 2015 |                               |
| 287 | J | Ahmed, Bilal; Syed, Asad; Rizvi, Asfa; Shahid, Mohammad; Bahkali, Ali H.; Khan, Mohammad Saghir; Musarrat, Javed                                                                          | Impact of metal-oxide nanoparticles on growth, physiology and yield of tomato ( <i>Solanum lycopersicum</i> L.) modulated by <i>Azotobacter salinestris</i> strain ASM | Article |  | Environ. Pollut.            | 2021 | 10.1016/j.envpol.2020.116218  |
| 288 | J | Josko, Izabela; Kusiak, Magdalena; Xing, Baoshan; Oleszczuk, Patryk                                                                                                                       | Combined effect of nano-CuO and nano-ZnO in plant-related system: From bioavailability in soil to transcriptional regulation of metal homeostasis in barley            | Article |  | J. Hazard. Mater.           | 2021 | 10.1016/j.jhazmat.2021.126230 |

|     |   |                                                                                                                                                                                    |                                                                                                                                                                                                         |         |  |                            |      |                                 |
|-----|---|------------------------------------------------------------------------------------------------------------------------------------------------------------------------------------|---------------------------------------------------------------------------------------------------------------------------------------------------------------------------------------------------------|---------|--|----------------------------|------|---------------------------------|
| 289 | J | Liu, Yang; Baas, Jan; Peijnenburg, Willie J. G. M.; Vijver, Martina G.                                                                                                             | Evaluating the combined toxicity of Cu and ZnO nanoparticles: Utility of the concept of additivity and a nested experimental design                                                                     | Article |  | Environ. Sci. Technol.     | 2016 | 10.1021/acs.est.6b00614         |
| 290 | J | Hidouri, Safa; Karmous, Ines; Kadri, Oumaima; Kharbech, Oussama; Chaoui, Abdelilah                                                                                                 | Clue of zinc oxide and copper oxide nanoparticles in the remediation of cadmium toxicity in <i>Phaseolus vulgaris</i> L. via the modulation of antioxidant and redox systems                            | Article |  | Environ. Sci. Pollut. Res. | 2022 | 10.1007/s11356-022-21799-2      |
| 291 | J | Chen, Chun; Unrine, Jason M.; Judy, Jonathan D.; Lewis, Ricky W.; Guo, Jing; McNear, David H., Jr.; Tsyusko, Olga V.                                                               | Toxicogenomic responses of the model Legume <i>Medicago truncatula</i> to aged biosolids containing a mixture of nanomaterials (TiO <sub>2</sub> , Ag, and ZnO) from a pilot wastewater treatment plant | Article |  | Environ. Sci. Technol.     | 2015 | 10.1021/acs.est.5b01211         |
| 292 | J | da Cruz, Tatiana N. M.; Savassa, Susilaine M.; Gomes, Marcos H. F.; Rodrigues, Eduardo S.; Duran, Nadia M.; de Almeida, Eduardo; Martinelli, Adriana P.; de Carvalho, Hudson W. P. | Shedding light on the mechanisms of absorption and transport of ZnO nanoparticles by plants via in vivo X-ray spectroscopy                                                                              | Article |  | Environ. Sci.: Nano        | 2017 | 10.1039/c7en00785j              |
| 293 | J | Debnath, Priyanka; Mondal, Arghadip; Sen, Kamalesh; Mishra, Debojyoti; Mondal, Naba Kumar                                                                                          | Genotoxicity study of nano Al <sub>2</sub> O <sub>3</sub> , TiO <sub>2</sub> and ZnO along with UV-B exposure: An <i>Allium cepa</i> root tip assay                                                     | Article |  | Sci. Total Environ.        | 2020 | 10.1016/j.scitotenv.2020.136592 |
| 294 | J | Ahmed, Bilal; Rizvi, Asfa; Syed, Asad; Jailani, Afreen; Elgorban, Abdallah M.; Khan, Mohammad Saghir; Al-Shwaiman, Hind A.; Lee, Jintae                                            | Differential bioaccumulations and ecotoxicological impacts of metal-oxide nanoparticles, bulk materials, and metal-ions in cucumbers grown in sandy clay loam soil                                      | Article |  | Environ. Pollut.           | 2021 | 10.1016/j.envpol.2021.117854    |
| 295 | J | Bashir, Arooj; Rizwan, Muhammad; Ali, Shafaqat; Adrees, Muhammad; Rehman, Muhammad Zia ur; Qayyum, Muhammad Farooq                                                                 | Effect of composted organic amendments and zinc oxide nanoparticles on growth and cadmium accumulation by wheat; a life cycle study                                                                     | Article |  | Environ. Sci. Pollut. Res. | 2020 | 10.1007/s11356-020-08739-8      |
| 296 | J | Ross, Shailise S.; Owen, Matthew J.; Pedersen, Brian P.; Liu, Gang-yu; Miller, William J. W.                                                                                       | Using mung beans as a simple, informative means to evaluate the phytotoxicity of engineered nanomaterials and introduce the concept                                                                     | Article |  | J. Chem. Educ.             | 2016 | 10.1021/acs.jchemed.5b01038     |

|     |   |                                                                                                             |                                                                                                                                                                                         |         |  |                        |      |                                 |
|-----|---|-------------------------------------------------------------------------------------------------------------|-----------------------------------------------------------------------------------------------------------------------------------------------------------------------------------------|---------|--|------------------------|------|---------------------------------|
|     |   |                                                                                                             | of nanophytotoxicity to undergraduate students                                                                                                                                          |         |  |                        |      |                                 |
| 297 | J | Jiang, Meng; Wang, Jiakuan; Rui, Mengmeng; Yang, Lijia; Shen, Jun; Chu, Huangwei; Song, Shiyong; Chen, Ying | OsFTIP7 determines metallic oxide nanoparticles response and tolerance by regulating auxin biosynthesis in rice                                                                         | Article |  | J. Hazard. Mater.      | 2021 | 10.1016/j.jhazmat.2020.123946   |
| 298 | J | Nath, Jayashree; Dror, Ishai; Landa, Premysl; Vanek, Tomas; Kaplan-Ashiri, Ifat; Berkowitz, Brian           | Synthesis and characterization of isotopically-labeled silver, copper and zinc oxide nanoparticles for tracing studies in plants                                                        | Article |  | Environ. Pollut.       | 2018 | 10.1016/j.envpol.2018.07.084    |
| 299 | J | Rani, Neelam; Kumari, Kusum; Sangwan, Parul; Barala, Poonam; Yadav, Jyoti; Vijeta; Rahul; Hooda, Vinita     | Nano-iron and nano-zinc induced growth and metabolic changes in <i>Vigna radiata</i>                                                                                                    | Article |  | Sustainability         | 2022 | 10.3390/su14148251              |
| 300 | J | Rashid, Md Harunur; Rahman, Mohammad Mahmudur; Halim, Md Abdul; Naidu, Ravi                                 | Growth, metal partitioning and antioxidant enzyme activities of mung beans as influenced by zinc oxide nanoparticles under cadmium stress                                               | Article |  | Crop Pasture Sci.      | 2021 | 10.1071/CP21598                 |
| 301 | J | Peng, Danliu; Zhang, Yue; Li, Qian; Song, Yutong; Ji, Jing; Wang, Gang; Guan, Chunfeng; Li, Xiaozhou        | Exogenous application and endogenous elevation of salicylic acid levels by overexpressing a salicylic acid-binding protein 2 gene enhance nZnO tolerance of tobacco plants              | Article |  | Plant Soil             | 2020 | 10.1007/s11104-020-04521-4      |
| 302 | J | Landa, Premysl; Cyrusova, Tereza; Jerabkova, Julie; Drabek, Ondrej; Vanek, Tomas; Podlipna, Radka           | Effect of metal oxides on plant germination: Phytotoxicity of nanoparticles, bulk materials, and metal ions                                                                             | Article |  | Water Air Soil Pollut. | 2016 | 10.1007/s11270-016-3156-9       |
| 303 | J | Zeid, Isam M. Abu; Mohamed, Fouad H.; Metwali, Ehab M. R.                                                   | Responses of two strawberry cultivars to NaCl-induced salt stress under the influence of ZnO nanoparticles                                                                              | Article |  | Saudi J. Biol. Sci.    | 2023 | 10.1016/j.sjbs.2023.103623      |
| 304 | J | Thapa, Mala; Sadhukhan, Raghunath; Mukherjee, Abhishek; Biswas, Prasanta Kumar                              | Effects of nZnS vs. nZnO and ZnCl <sub>2</sub> on mungbean [ <i>Vigna radiata</i> (L.) R. Wilczek] plant and <i>Bradyrhizobium symbiosis</i> : A life cycle study                       | Article |  | NanoImpact             | 2023 | 10.1016/j.impact.2022.100440    |
| 305 | J | Yusefi-Tanha, Elham; Fallah, Sina; Rostamnejadi, Ali; Pokhrel, Lok Raj                                      | Responses of soybean ( <i>Glycine max</i> [L.] Merr.) to zinc oxide nanoparticles: Understanding changes in root system architecture, zinc tissue partitioning and soil characteristics | Article |  | Sci. Total Environ.    | 2022 | 10.1016/j.scitotenv.2022.155348 |



|     |   |                                                                                                                                                                                                                                                                                                                      |                                                                                                                                                                                              |         |  |                               |      |                                 |
|-----|---|----------------------------------------------------------------------------------------------------------------------------------------------------------------------------------------------------------------------------------------------------------------------------------------------------------------------|----------------------------------------------------------------------------------------------------------------------------------------------------------------------------------------------|---------|--|-------------------------------|------|---------------------------------|
| 306 | J | Sharifan, Hamidreza; Moore, Janie; Ma, Xingmao                                                                                                                                                                                                                                                                       | Zinc oxide (ZnO) nanoparticles elevated iron and copper contents and mitigated the bioavailability of lead and cadmium in different leafy greens                                             | Article |  | Ecotox. Environ. Safe.        | 2020 | 10.1016/j.ecoenv.2020.110177    |
| 307 | J | Bhattacharjee, Rahul; Kumar, Lamha; Mukerjee, Nobendu; Anand, Utpal; Dhasmana, Archana; Preetam, Subham; Bhaumik, Samudra; Sihi, Sanjana; Pal, Sanjana; Khare, Tushar; Chattopadhyay, Soham; El-Zahaby, Sally A.; Alexiou, Athanasios; Koshy, Eapen P.; Kumar, Vinay; Malik, Sumira; Dey, Abhijit; Prockow, Jaroslaw | The emergence of metal oxide nanoparticles (NPs) as a phytomedicine: A two-facet role in plant growth, nanotoxicity and anti-phyto-microbial activity                                        | Review  |  | Biomed. Pharmacother.         | 2022 | 10.1016/j.biopha.2022.113658    |
| 308 | J | Liu, Ruiqiang; Zhang, Huiying; Lal, Rattan                                                                                                                                                                                                                                                                           | Effects of stabilized nanoparticles of copper, zinc, manganese, and iron oxides in low concentrations on lettuce ( <i>Lactuca sativa</i> ) seed germination: Nanotoxicants or nanonutrients? | Article |  | Water Air Soil Pollut.        | 2016 | 10.1007/s11270-015-2738-2       |
| 309 | J | Du, Wenchao; Xu, Meiling; Yin, Ying; Sun, Yuanyuan; Wu, Jichun; Zhu, Jianguo; Guo, Hongyan                                                                                                                                                                                                                           | Elevated CO <sub>2</sub> levels alleviated toxicity of ZnO nanoparticles to rice and soil bacteria                                                                                           | Article |  | Sci. Total Environ.           | 2022 | 10.1016/j.scitotenv.2021.149822 |
| 310 | J | Samanta, Santanu; Roychoudhury, Aryadeep                                                                                                                                                                                                                                                                             | Recent trend in nanoparticle research in regulating arsenic bioaccumulation and mitigating arsenic toxicity in plant species                                                                 | Review  |  | J. Plant Biochem. Biotechnol. | 2021 | 10.1007/s13562-021-00727-4      |
| 311 | J | Raza, Syed Hammad; Shahzadi, Anam; Iqbal, Muhammad; Shafiq, Fahad; Mahmood, Arslan; Anwar, Sumera; Ashraf, Muhammad                                                                                                                                                                                                  | Foliar application of nano-zinc oxide crystals improved zinc biofortification in cauliflower ( <i>Brassica oleracea</i> L. var. botrytis)                                                    | Article |  | Appl. Nanosci.                | 2022 | 10.1007/s13204-022-02455-0      |
| 312 | J | Mehmood, Faisal; Kousar, Hina; Hassan, Faiza; Zaman, Qamar Uz                                                                                                                                                                                                                                                        | Synthesis of zinc oxide nanoparticles by precipitation and sol-gel methods from different precursors and their comparison impact on seedling attributes of wheat                             | Article |  | J. Nano Res.                  | 2022 | 10.4028/p-2sa57f                |
| 313 | J | Ulhassan, Zaid; Bhat, Javaid Akhter; Zhou, Weijun;                                                                                                                                                                                                                                                                   | Attenuation mechanisms of arsenic induced toxicity and its accumulation in                                                                                                                   | Review  |  | Environ. Pollut.              | 2022 | 10.1016/j.envpol.2022.119038    |

|     |   |                                                                                                                                                                                      |                                                                                                                                                                                                                          |                   |                                                                               |                            |      |                               |
|-----|---|--------------------------------------------------------------------------------------------------------------------------------------------------------------------------------------|--------------------------------------------------------------------------------------------------------------------------------------------------------------------------------------------------------------------------|-------------------|-------------------------------------------------------------------------------|----------------------------|------|-------------------------------|
|     |   | Senan, Ahmed M.; Alam, Pravej; Ahmad, Parvaiz                                                                                                                                        | plants by engineered nanoparticles: A review                                                                                                                                                                             |                   |                                                                               |                            |      |                               |
| 314 | J | Tanveer, Yashfa; Jahangir, Saman; Shah, Zafar Abbas; Yasmin, Humaira; Nosheen, Asia; Hassan, Muhammad Nadeem; Illyas, Noshin; Bajguz, Andrzej; El-Sheikh, Mohamed A.; Ahmad, Parvaiz | Zinc oxide nanoparticles mediated biostimulant impact on cadmium detoxification and in silico analysis of zinc oxide-cadmium networks in <i>Zea mays</i> L. regulome                                                     | Article           |                                                                               | Environ. Pollut.           | 2023 | 10.1016/j.envpol.2022.120641  |
| 315 | C | Starodub, Nickolaj F.; Shavanova, Kateryna E.; Taran, Marina V.; Katsev, Andrey M.; Safronyuk, Sergey L.; Son'ko, Roman V.; Bisio, Chiara; Guidotti, Matteo                          | Nanomaterials: Biological effects and some aspects of applications in ecology and agriculture                                                                                                                            | Proceedings Paper | 8th International Conference on Advanced Optical Materials and Devices (AOMD) |                            | 2014 | 10.1117/12.2081468            |
| 316 | J | Abrica-Gonzalez, Paulina; Gomez-Arroyo, Sandra                                                                                                                                       | Effects and characterization of airborne nanoparticles (CuO, ZnO-NPs) in plants                                                                                                                                          | Review            |                                                                               | Rev. Int. Contam. Ambient. | 2022 | 10.20937/RICA.54303           |
| 317 | J | Afzal, Shadma; Singh, Nand K.                                                                                                                                                        | Effect of zinc and iron oxide nanoparticles on plant physiology, seed quality and microbial community structure in a rice-soil-microbial ecosystem                                                                       | Article           |                                                                               | Environ. Pollut.           | 2022 | 10.1016/j.envpol.2022.120224  |
| 318 | J | Iranbakhsh, Alireza; Ardebili, Zahra Oraghi; Ardebili, Narges Oraghi; Ghoranneviss, Mahmood; Safari, Nasrin                                                                          | Cold plasma relieved toxicity signs of nano zinc oxide in <i>Capsicum annuum</i> cayenne via modifying growth, differentiation, and physiology                                                                           | Article           |                                                                               | Acta Physiol. Plant.       | 2018 | 10.1007/s11738-018-2730-8     |
| 319 | J | Nekoukhou, Marjan; Fallah, Sina; Abbasi-Surki, Ali; Pokhrel, Lok Raj; Rostamnejadi, Ali                                                                                              | Improved efficacy of foliar application of zinc oxide nanoparticles on zinc biofortification, primary productivity and secondary metabolite production in dragonhead                                                     | Article           |                                                                               | J. Clean Prod.             | 2022 | 10.1016/j.jclepro.2022.134803 |
| 320 | J | Yadav, Vaishali; Arif, Namira; Chauhan, Devendra Kumar                                                                                                                               | A comparative study of the effective response of di-potassium phosphate (K <sub>2</sub> HPO <sub>4</sub> ) on physiological, biochemical and anatomical aspects of crops dwelling with zinc oxide nanoparticles toxicity | Article           |                                                                               | Toxicol. Res.              | 2021 | 10.1093/toxres/tfab004        |

|     |   |                                                                                                                                        |                                                                                                                                                                                                             |         |  |                           |      |                                 |
|-----|---|----------------------------------------------------------------------------------------------------------------------------------------|-------------------------------------------------------------------------------------------------------------------------------------------------------------------------------------------------------------|---------|--|---------------------------|------|---------------------------------|
| 321 | J | Haulik, B.; Balla, S.; Palfi, O.; Szekeres, L.; Jurikova, T.; Saly, P.; Bakonyi, G.                                                    | Comparative ecotoxicity of the nano Ag, TiO <sub>2</sub> and ZnO to aquatic species assemblages                                                                                                             | Article |  | Appl. Ecol. Environ. Res. | 2015 |                                 |
| 322 | J | Dolores Fernandez, Maria; Nieves Alonso-Blazquez, Maria; Garcia-Gomez, Concepcion; Babin, Mar                                          | Evaluation of zinc oxide nanoparticle toxicity in sludge products applied to agricultural soil using multispecies soil systems                                                                              | Article |  | Sci. Total Environ.       | 2014 | 10.1016/j.scitotenv.2014.07.085 |
| 323 | J | Yang, Xiangbo; Bai, Xia; Zhang, Zhenkai; Yu, Xiaoming                                                                                  | Metal oxide nanomaterials as rice transgenic carriers                                                                                                                                                       | Article |  | Adv. Mater. Sci. Eng.     | 2022 | 10.1155/2022/4375986            |
| 324 | J | Bradfield, Scott J.; Kumar, Pawan; White, Jason C.; Ebbs, Stephen D.                                                                   | Zinc, copper, or cerium accumulation from metal oxide nanoparticles or ions in sweet potato: Yield effects and projected dietary intake from consumption                                                    | Article |  | Plant Physiol. Biochem.   | 2017 | 10.1016/j.plaphy.2016.04.008    |
| 325 | J | Cai, Yue; Yuan, Binbin; Ma, Xiaoyue; Fang, Guodong; Zhou, Dongmei; Gao, Juan                                                           | Foliar application of SiO <sub>2</sub> and ZnO nanoparticles affected polycyclic aromatic hydrocarbons uptake of Amaranth ( <i>Amaranthus tricolor</i> L.): A metabolomics and typical statistical analysis | Article |  | Sci. Total Environ.       | 2022 | 10.1016/j.scitotenv.2022.155258 |
| 326 | J | Gupta, Nakul; Singh, Prabhakar Mohan; Sagar, Vidya; Pandya, Alok; Chinnappa, Manimurugan; Kumar, Rajesh; Bahadur, Anant                | Seed priming with ZnO and Fe <sub>3</sub> O <sub>4</sub> nanoparticles alleviate the lead toxicity in <i>Basella alba</i> L. through reduced lead uptake and regulation of ROS                              | Article |  | Plants-Basel              | 2022 | 10.3390/plants11172227          |
| 327 | J | Dimkpa, Christian O.; Singh, Upendra; Bindraban, Prem S.; Adisa, Ishaq O.; Elmer, Wade H.; Gardea-Torresdey, Jorge L.; White, Jason C. | Addition-omission of zinc, copper, and boron nano and bulk oxide particles demonstrate element and size-specific response of soybean to micronutrients exposure                                             | Article |  | Sci. Total Environ.       | 2019 | 10.1016/j.scitotenv.2019.02.142 |
| 328 | J | Venkatachalam, P.; Jayaraj, M.; Manikandan, R.; Geetha, N.; Rene, Eldon R.; Sharma, N. C.; Sahi, S. V.                                 | Zinc oxide nanoparticles (ZnONPs) alleviate heavy metal-induced toxicity in <i>Leucaena leucocephala</i> seedlings: A physiochemical analysis                                                               | Article |  | Plant Physiol. Biochem.   | 2017 | 10.1016/j.plaphy.2016.08.022    |
| 329 | J | Sharifan, Hamidreza; Ma, Xingmao; Moore, Janie McClurkin; Habib, Mohammad Ruzlan; Eyans, Catelyn                                       | Zinc oxide nanoparticles alleviated the bioavailability of cadmium and lead and changed the uptake of iron in hydroponically grown lettuce ( <i>Lactuca sativa</i> L. var. Longifolia)                      | Article |  | ACS Sustain. Chem. Eng.   | 2019 | 10.1021/acssuschemeng.9b03531   |

|     |   |                                                                                                                                                                                                           |                                                                                                                                                                |                   |                                                                                                    |                              |      |                                 |
|-----|---|-----------------------------------------------------------------------------------------------------------------------------------------------------------------------------------------------------------|----------------------------------------------------------------------------------------------------------------------------------------------------------------|-------------------|----------------------------------------------------------------------------------------------------|------------------------------|------|---------------------------------|
| 330 | J | Pedruzzi, Danielle P.; Araujo, Leandro O.; Falco, William F.; Machado, Giovanna; Casagrande, Gleison A.; Colbeck, Ian; Lawson, Tracy; Oliveira, Samuel L.; Caires, Anderson R. L.                         | ZnO nanoparticles impact on the photosynthetic activity of <i>Vicia faba</i> : Effect of particle size and concentration                                       | Article           |                                                                                                    | NanoImpact                   | 2020 | 10.1016/j.impact.2020.100246    |
| 331 | J | Yarmohammadi, Afsaneh; Khoramivafa, Mahmud; Honarmand, Saeid Jalali                                                                                                                                       | Humic acid reduces the CuO and ZnO nanoparticles cellular toxicity in rapeseed ( <i>Brassica napus</i> )                                                       | Article           |                                                                                                    | Cell. Mol. Biol.             | 2019 | 10.14715/cmb/2019.65.4.5        |
| 332 | J | Babajani, Alameh; Iranbakhsh, Alireza; Ardebili, Zahra Oraghi; Eslami, Bahman                                                                                                                             | Differential growth, nutrition, physiology, and gene expression in <i>Melissa officinalis</i> mediated by zinc oxide and elemental selenium nanoparticles      | Article           |                                                                                                    | Environ. Sci. Pollut. Res.   | 2019 | 10.1007/s11356-019-05676-z      |
| 333 | C | Pavelicova, Kristyna; Strejckova, Aneta; Rankic, Ivan; Vaneckova, Tereza; Zelnickova, Jaroslava; Huska, Dalibor; Vaculovicova, Marketa                                                                    | Fluorescence in vivo imaging in the monitoring of effect of nanoparticles on microalgae                                                                        | Proceedings Paper | 25th International PhD Students Conference for Undergraduate and Postgraduate Students (MendelNet) |                              | 2018 |                                 |
| 334 | J | Yusefi-Tanha, Elham; Fallah, Sina; Pokhrel, Lok Raj; Rostamnejadi, Ali                                                                                                                                    | Addressing global food insecurity: Soil-applied zinc oxide nanoparticles promote yield attributes and seed nutrient quality in <i>Glycine max</i> L.           | Article           |                                                                                                    | Sci. Total Environ.          | 2023 | 10.1016/j.scitotenv.2023.162762 |
| 335 | J | Omar Ponce-Garcia, Castor; Manuel Soto-Parra, Juan; Sanchez, Esteban; Munoz-Marquez, Ezequiel; Javier Pina-Ramirez, Francisco; Antonia Flores-Cordova, Maria; Perez-Leal, Ramona; Yanez Munoz, Rosa Maria | Efficiency of nanoparticle, sulfate, and zinc-chelate use on biomass, yield, and nitrogen assimilation in green beans                                          | Article           |                                                                                                    | Agronomy-Basel               | 2019 | 10.3390/agronomy9030128         |
| 336 | J | Ishwarya, Ramachandran; Tamilmani, Govindan; Jayakumar, Rengarajan; Albeshr, Mohammed F.;                                                                                                                 | Synthesis of zinc oxide nanoparticles using <i>Vigna mungo</i> seed husk extract: An enhanced antibacterial, anticancer activity and eco-friendly bio-toxicity | Article           |                                                                                                    | J. Drug Deliv. Sci. Technol. | 2023 | 10.1016/j.jddst.2022.104002     |

|  |  |                                                                                                      |                                     |  |  |  |  |  |
|--|--|------------------------------------------------------------------------------------------------------|-------------------------------------|--|--|--|--|--|
|  |  | Mahboob, Shahid; Shahid, Duaa; Riaz, Mian Nadeem; Govindarajan, Marimuthu; Vasecharan, Baskaralingam | assessment on algae and zooplankton |  |  |  |  |  |
|--|--|------------------------------------------------------------------------------------------------------|-------------------------------------|--|--|--|--|--|
